# Supplementary material for: BAl4Mg−/0/+: Global Minima with a Planar Tetracoordinate or Hypercoordinate Boron Atom
Source: MDPI journal article supplement (doi:10.3390/atoms9040089), 2021-10-27
Supplement: s1 [file s1]

**Supporting information for:**

**$\text{BAI}_4\text{Mg}^{-/0/+}$ : Global Minima with A Planar**

**Tetracoordinate or Hypercoordinate Boron Atom**

Maya Khatun,<sup>†</sup> Saikat Roy,<sup>†</sup> Sandip Giri,<sup>†</sup> Sasanka Sankhar Reddy CH,<sup>‡</sup>  
Anakuthil Anoop,<sup>\*,†</sup> and Venkatesan S. Thimmakondur<sup>\*,¶</sup>

<sup>†</sup>*Department of Chemistry, Indian Institute of Technology Kharagpur, Kharagpur 721 302,  
West Bengal, India.*

<sup>‡</sup>*Department of Electrical and Electronics Engineering, Birla Institute of Technology and  
Science, Pilani K K Birla Goa Campus, Goa - 403 726, India.*

<sup>¶</sup>*Department of Chemistry and Biochemistry, San Diego State University, San Diego, CA  
92182-1030, USA.*

E-mail: anoop@chem.iitkgp.ac.in; vthimmakondusamy@sdsu.edu

# Contents

|                 |    |
|-----------------|----|
| List of Figures | S2 |
|-----------------|----|

|                |    |
|----------------|----|
| List of Tables | S4 |
|----------------|----|

## List of Figures

|    |                                                                                                                                                                                                                                                                                                                                                                       |     |
|----|-----------------------------------------------------------------------------------------------------------------------------------------------------------------------------------------------------------------------------------------------------------------------------------------------------------------------------------------------------------------------|-----|
| S1 | Isomers <b>1a-9a</b> of $\text{BAI}_4\text{Mg}^-$ in their respective singlet ground electronic states. ZPVE-corrected relative energies (in $\text{kcal mol}^{-1}$ ) are calculated at the $\omega\text{B97XD}/6\text{-}311++\text{G}(2\text{d},2\text{p})$ level of theory. Relative energies obtained at the CBS-QB3 level are shown in parentheses. . . . .       | S6  |
| S2 | Isomers <b>10a-19a</b> of $\text{BAI}_4\text{Mg}^-$ in their respective singlet ground electronic states. ZPVE-corrected relative energies (in $\text{kcal mol}^{-1}$ ) are calculated at the $\omega\text{B97XD}/6\text{-}311++\text{G}(2\text{d},2\text{p})$ level of theory. . . . .                                                                               | S7  |
| S3 | Isomers <b>20a-33a</b> of $\text{BAI}_4\text{Mg}^-$ in their respective singlet ground electronic states. ZPVE-corrected relative energies (in $\text{kcal mol}^{-1}$ ) are calculated at the $\omega\text{B97XD}/6\text{-}311++\text{G}(2\text{d},2\text{p})$ level of theory. . . . .                                                                               | S8  |
| S4 | Isomers <b>1n-9n</b> of $\text{BAI}_4\text{Mg}$ in their respective doublet ground electronic states. ZPVE-corrected relative energies (in $\text{kcal mol}^{-1}$ ) are calculated at the $\text{U}\omega\text{B97XD}/6\text{-}311++\text{G}(2\text{d},2\text{p})$ level of theory. Relative energies obtained at the CBS-QB3 level are shown in parentheses. . . . . | S9  |
| S5 | Isomers <b>10n-19n</b> of $\text{BAI}_4\text{Mg}$ in their respective doublet ground electronic states. ZPVE-corrected relative energies (in $\text{kcal mol}^{-1}$ ) are calculated at the $\text{U}\omega\text{B97XD}/6\text{-}311++\text{G}(2\text{d},2\text{p})$ level of theory. . . . .                                                                         | S10 |
| S6 | Isomers <b>20n-33n</b> of $\text{BAI}_4\text{Mg}$ in their respective doublet ground electronic states. ZPVE-corrected relative energies (in $\text{kcal mol}^{-1}$ ) are calculated at the $\text{U}\omega\text{B97XD}/6\text{-}311++\text{G}(2\text{d},2\text{p})$ level of theory. . . . .                                                                         | S11 |

|     |                                                                                                                                                                                                                                                                                                                                                                 |     |
|-----|-----------------------------------------------------------------------------------------------------------------------------------------------------------------------------------------------------------------------------------------------------------------------------------------------------------------------------------------------------------------|-----|
| S7  | Isomers <b>1c-8c</b> of $\text{BAI}_4\text{Mg}^+$ in their respective singlet ground electronic states. ZPVE-corrected relative energies (in $\text{kcal mol}^{-1}$ ) are calculated at the $\omega\text{B97XD}/6\text{-}311++\text{G}(2\text{d},2\text{p})$ level of theory. Relative energies obtained at the CBS-QB3 level are shown in parentheses. . . . . | S12 |
| S8  | Isomers <b>9c-18c</b> of $\text{BAI}_4\text{Mg}^+$ in their respective singlet ground electronic states. ZPVE-corrected relative energies (in $\text{kcal mol}^{-1}$ ) are calculated at the $\omega\text{B97XD}/6\text{-}311++\text{G}(2\text{d},2\text{p})$ level of theory. . . . .                                                                          | S13 |
| S9  | Isomers <b>19c-33c</b> of $\text{BAI}_4\text{Mg}^+$ in their respective singlet ground electronic states. ZPVE-corrected relative energies (in $\text{kcal mol}^{-1}$ ) are calculated at the $\omega\text{B97XD}/6\text{-}311++\text{G}(2\text{d},2\text{p})$ level of theory. . . . .                                                                         | S14 |
| S10 | Isomers <b>1at-8at</b> of $\text{BAI}_4\text{Mg}^-$ in their respective triplet ground electronic states. ZPVE-corrected relative energies (in $\text{kcal mol}^{-1}$ ) are calculated at the $\text{U}\omega\text{B97XD}/6\text{-}311++\text{G}(2\text{d},2\text{p})$ level of theory. . . . .                                                                 | S18 |
| S11 | Isomers <b>1nq-7nq</b> of $\text{BAI}_4\text{Mg}$ in their respective quartet ground electronic states. ZPVE-corrected relative energies (in $\text{kcal mol}^{-1}$ ) are calculated at the $\text{U}\omega\text{B97XD}/6\text{-}311++\text{G}(2\text{d},2\text{p})$ level of theory. . . . .                                                                   | S19 |
| S12 | Isomers <b>1ct-8ct</b> of $\text{BAI}_4\text{Mg}^+$ in their respective triplet ground electronic states. ZPVE-corrected relative energies (in $\text{kcal mol}^{-1}$ ) are calculated at the $\text{U}\omega\text{B97XD}/6\text{-}311++\text{G}(2\text{d},2\text{p})$ level of theory. . . . .                                                                 | S20 |
| S13 | Energy evolution of ptB $\text{BAI}_4\text{Mg}$ ( <b>2n</b> ) at 298 K for 2000 fs time in the ADMP simulation performed at the $\text{U}\omega\text{B97XD}/6\text{-}311++\text{G}(2\text{d},2\text{p})$ level. . . . .                                                                                                                                         | S24 |
| S14 | Energy evolution of ptB $\text{BAI}_4\text{Mg}^+$ ( <b>1c</b> ) at 298 K for 2000 fs time in the ADMP simulation performed at the $\omega\text{B97XD}/6\text{-}311++\text{G}(2\text{d},2\text{p})$ level. . . . .                                                                                                                                               | S25 |
| S15 | Energy evolution of ppB $\text{BAI}_4\text{Mg}^-$ ( <b>2a</b> ) at 298 K for 2000 fs time in the ADMP simulation performed at the $\omega\text{B97XD}/6\text{-}311++\text{G}(2\text{d},2\text{p})$ . . . . .                                                                                                                                                    | S26 |
| S16 | Energy evolution of ppB $\text{BAI}_4\text{Mg}$ ( <b>1n</b> ) at 298 K for 2000 fs time in the ADMP simulation performed at the $\text{U}\omega\text{B97XD}/6\text{-}311++\text{G}(2\text{d},2\text{p})$ level. . . . .                                                                                                                                         | S27 |

|     |                                                                                                                                                                                                     |     |
|-----|-----------------------------------------------------------------------------------------------------------------------------------------------------------------------------------------------------|-----|
| S17 | Energy evolution of ptB $\text{BAI}_4\text{Mg}^+$ ( <b>3c</b> ) at 100 K for 2000 fs time in the ADMP simulation performed at the $\omega\text{B97XD}/6\text{-}311\text{++G(2d,2p)}$ level. . . . . | S28 |
| S18 | Energy evolution of ptB $\text{BAI}_4\text{Mg}^+$ ( <b>3c</b> ) at 200 K for 2000 fs time in the ADMP simulation performed at the $\omega\text{B97XD}/6\text{-}311\text{++G(2d,2p)}$ level. . . . . | S29 |

## List of Tables

|    |                                                                                                                                                                                                                                                                                                                                                                                                                                                                                        |     |
|----|----------------------------------------------------------------------------------------------------------------------------------------------------------------------------------------------------------------------------------------------------------------------------------------------------------------------------------------------------------------------------------------------------------------------------------------------------------------------------------------|-----|
| S1 | Total energy ( $E$ ), zero-point vibrational energy ( $ZPVE$ ), $ZPVE$ -corrected total energy ( $E+ZPVE$ ), net dipole moment ( $\mu$ ), relative energy without $ZPVE$ -correction ( $\Delta E_e$ ), $ZPVE$ -corrected relative energy ( $\Delta E_0$ ), and number of imaginary frequencies of $\text{BAI}_4\text{Mg}^-$ isomers in their respective singlet ground electronic states calculated at the $\omega\text{B97XD}/6\text{-}311\text{++G(2d,2p)}$ level of theory.         | S15 |
| S2 | Total energy ( $E$ ), zero-point vibrational energy ( $ZPVE$ ), $ZPVE$ -corrected total energy ( $E+ZPVE$ ), net dipole moment ( $\mu$ ), relative energy without $ZPVE$ -correction ( $\Delta E_e$ ), $ZPVE$ -corrected relative energy ( $\Delta E_0$ ), and number of imaginary frequencies of $\text{BAI}_4\text{Mg}$ isomers in their respective doublet ground electronic states calculated at the $\text{U}\omega\text{B97XD}/6\text{-}311\text{++G(2d,2p)}$ level of theory.   | S16 |
| S3 | Total energy ( $E$ ), zero-point vibrational energy ( $ZPVE$ ), $ZPVE$ -corrected total energy ( $E+ZPVE$ ), net dipole moment ( $\mu$ ), relative energy without $ZPVE$ -correction ( $\Delta E_e$ ), $ZPVE$ -corrected relative energy ( $\Delta E_0$ ), and number of imaginary frequencies of $\text{BAI}_4\text{Mg}^+$ isomers in their respective singlet ground electronic states calculated at the $\omega\text{B97XD}/6\text{-}311\text{++G(2d,2p)}$ level of theory.         | S17 |
| S4 | Total energy ( $E$ ), zero-point vibrational energy ( $ZPVE$ ), $ZPVE$ -corrected total energy ( $E+ZPVE$ ), net dipole moment ( $\mu$ ), relative energy without $ZPVE$ -correction ( $\Delta E_e$ ), $ZPVE$ -corrected relative energy ( $\Delta E_0$ ), and number of imaginary frequencies of $\text{BAI}_4\text{Mg}^-$ isomers in their respective triplet ground electronic states calculated at the $\text{U}\omega\text{B97XD}/6\text{-}311\text{++G(2d,2p)}$ level of theory. | S21 |



|    |                                                                                                                                                                                                                                                                                                                                                                                                                                                                                                      |     |
|----|------------------------------------------------------------------------------------------------------------------------------------------------------------------------------------------------------------------------------------------------------------------------------------------------------------------------------------------------------------------------------------------------------------------------------------------------------------------------------------------------------|-----|
| S5 | Total energy ( $E$ ), zero-point vibrational energy ( $ZPVE$ ), $ZPVE$ -corrected total energy ( $E+ZPVE$ ), net dipole moment ( $\mu$ ), relative energy without $ZPVE$ -correction ( $\Delta E_e$ ), $ZPVE$ -corrected relative energy ( $\Delta E_0$ ), and number of imaginary frequencies of $\text{BAI}_4\text{Mg}$ isomers in their respective quartet ground electronic states calculated at the $\text{U}\omega\text{B97XD}/6\text{-}311\text{++G}(2\text{d},2\text{p})$ level of theory.   | S22 |
| S6 | Total energy ( $E$ ), zero-point vibrational energy ( $ZPVE$ ), $ZPVE$ -corrected total energy ( $E+ZPVE$ ), net dipole moment ( $\mu$ ), relative energy without $ZPVE$ -correction ( $\Delta E_e$ ), $ZPVE$ -corrected relative energy ( $\Delta E_0$ ), and number of imaginary frequencies of $\text{BAI}_4\text{Mg}^+$ isomers in their respective triplet ground electronic states calculated at the $\text{U}\omega\text{B97XD}/6\text{-}311\text{++G}(2\text{d},2\text{p})$ level of theory. | S23 |
| S7 | Molecular orbital composition analysis by NAO method. Major atomic orbital contributions (%) are given . . . . .                                                                                                                                                                                                                                                                                                                                                                                     | S30 |

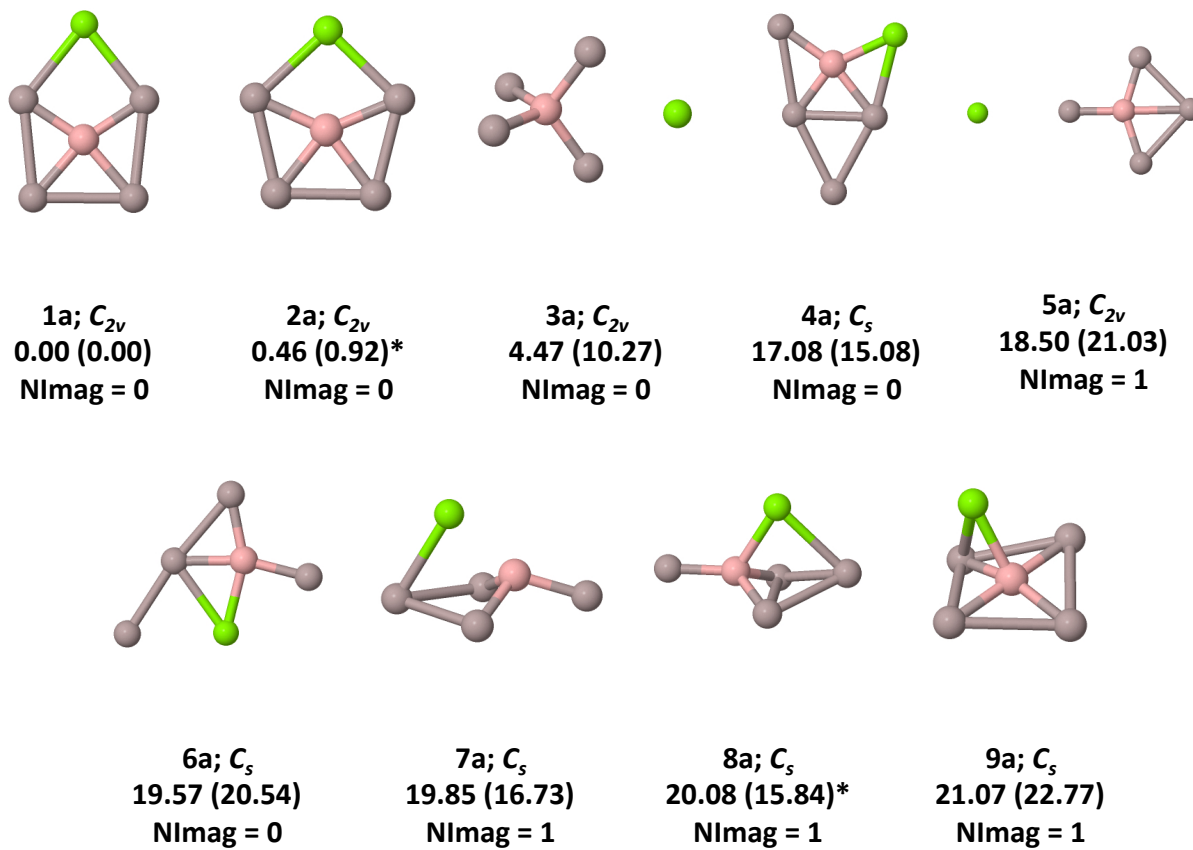

Figure S1: Isomers **1a-9a** of BAl<sub>4</sub>Mg<sup>-</sup> in their respective singlet ground electronic states. ZPVE-corrected relative energies (in kcal mol<sup>-1</sup>) are calculated at the  $\omega$ B97XD/6-311++G(2d,2p) level of theory. Relative energies obtained at the CBS-QB3 level are shown in parentheses.

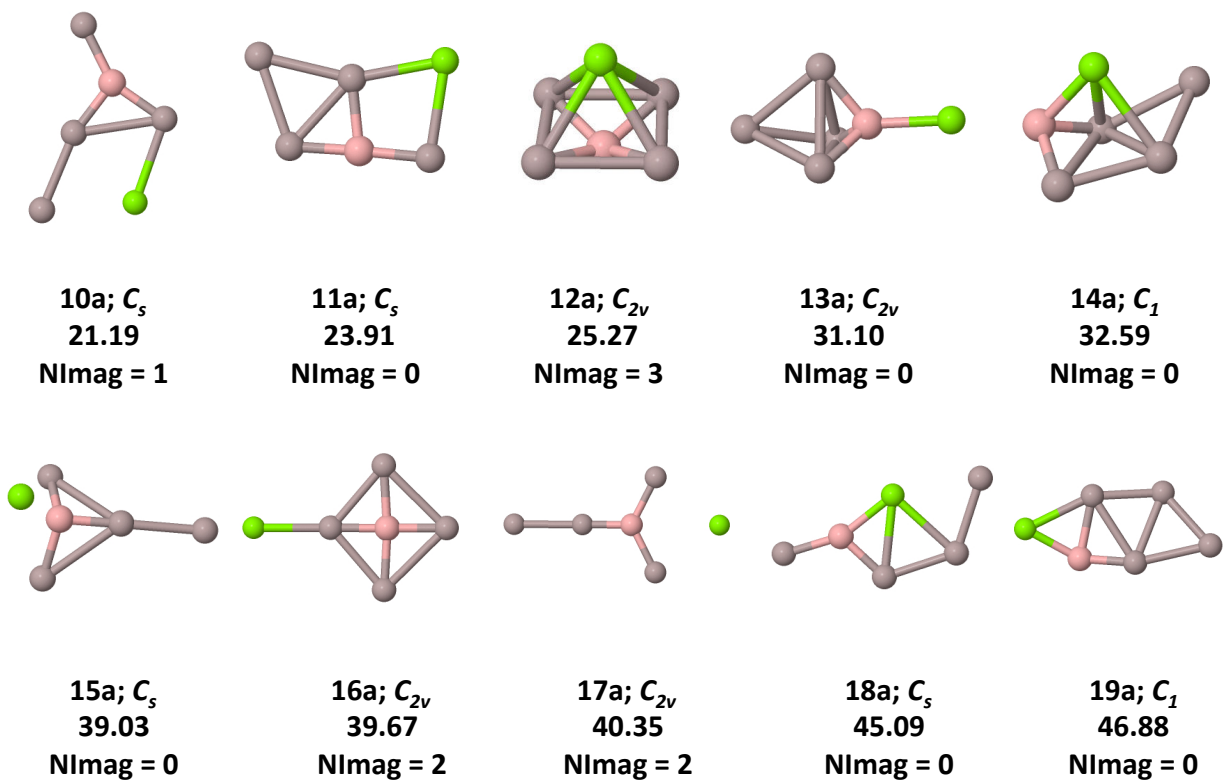

Figure S2: Isomers **10a-19a** of  $\text{BAl}_4\text{Mg}^-$  in their respective singlet ground electronic states. ZPVE-corrected relative energies (in  $\text{kcal mol}^{-1}$ ) are calculated at the  $\omega\text{B97XD}/6\text{-311++G}(2\text{d},2\text{p})$  level of theory.

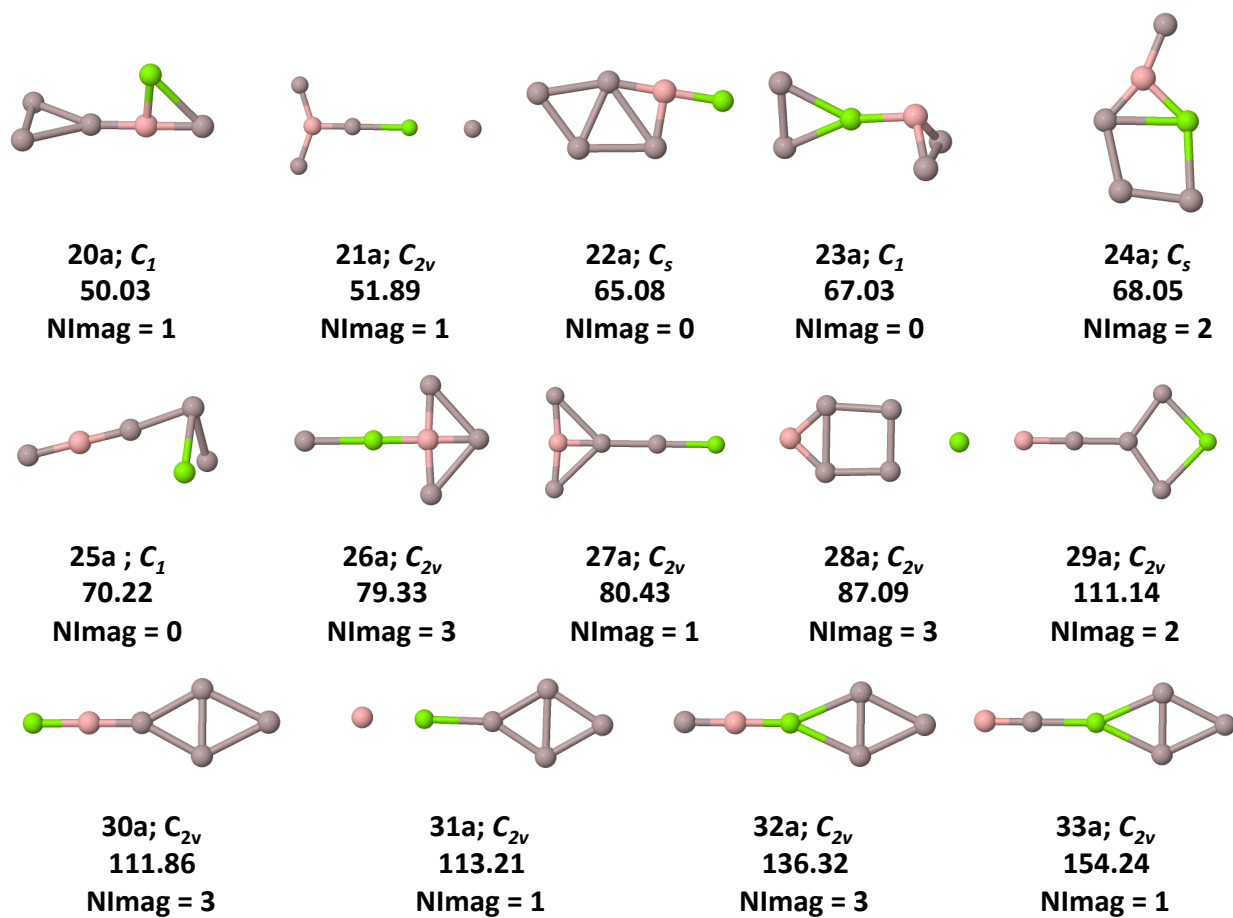

Figure S3: Isomers **20a-33a** of  $\text{BA}_4\text{Mg}^-$  in their respective singlet ground electronic states. ZPVE-corrected relative energies (in  $\text{kcal mol}^{-1}$ ) are calculated at the  $\omega\text{B97XD}/6\text{-}311++\text{G}(2\text{d},2\text{p})$  level of theory.

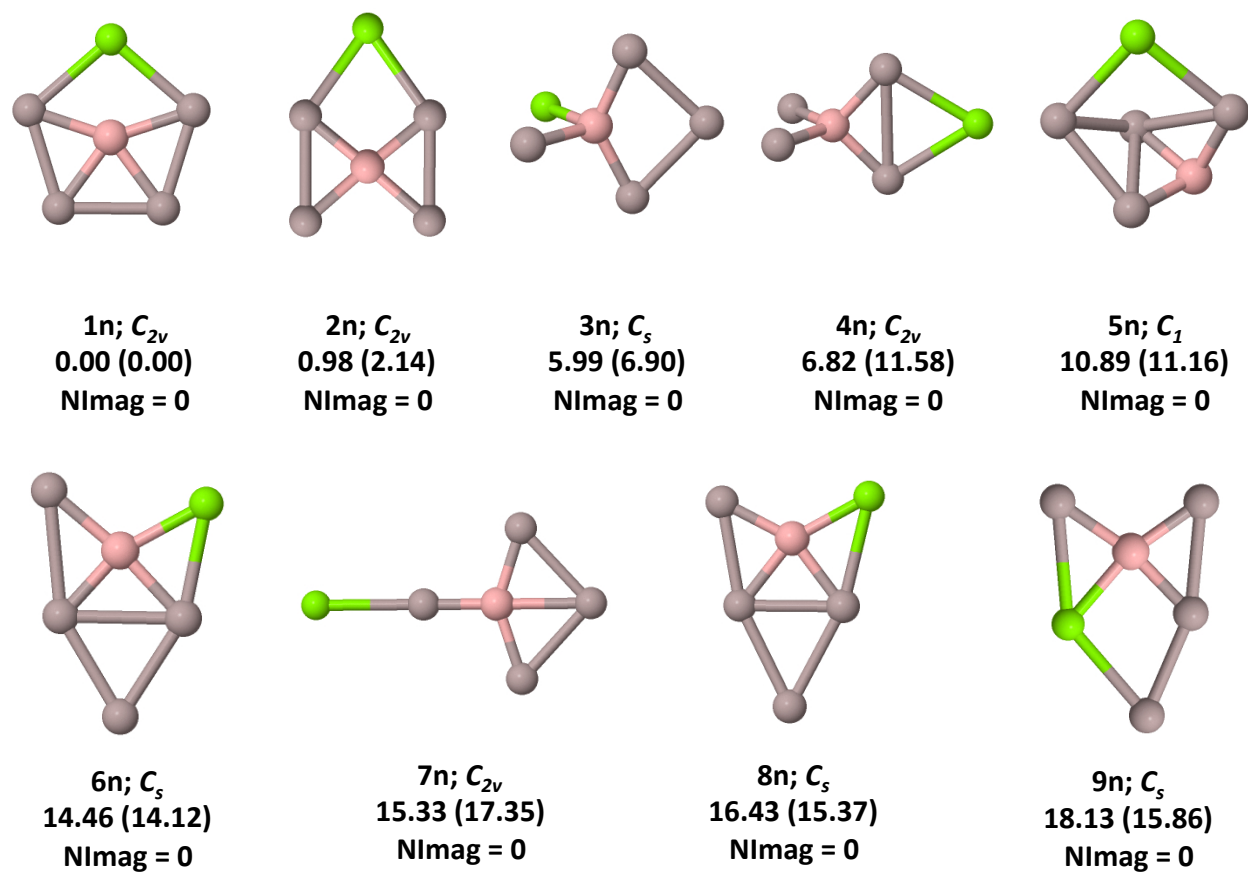

Figure S4: Isomers **1n-9n** of  $\text{BAI}_4\text{Mg}$  in their respective doublet ground electronic states. ZPVE-corrected relative energies (in  $\text{kcal mol}^{-1}$ ) are calculated at the  $\text{U}\omega\text{B97XD/6-311++G(2d,2p)}$  level of theory. Relative energies obtained at the CBS-QB3 level are shown in parentheses.

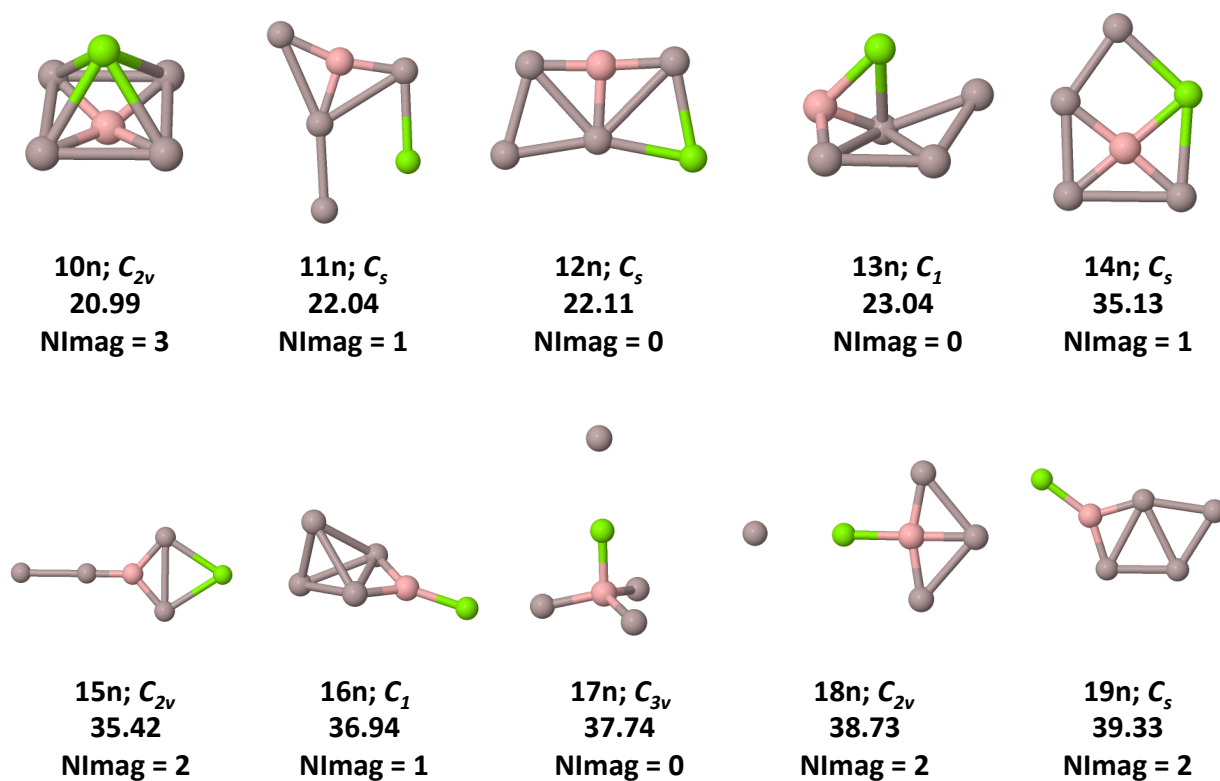

Figure S5: Isomers **10n-19n** of  $\text{BAI}_4\text{Mg}$  in their respective doublet ground electronic states. ZPVE-corrected relative energies (in  $\text{kcal mol}^{-1}$ ) are calculated at the  $\text{U}\omega\text{B97XD/6-311++G(2d,2p)}$  level of theory.

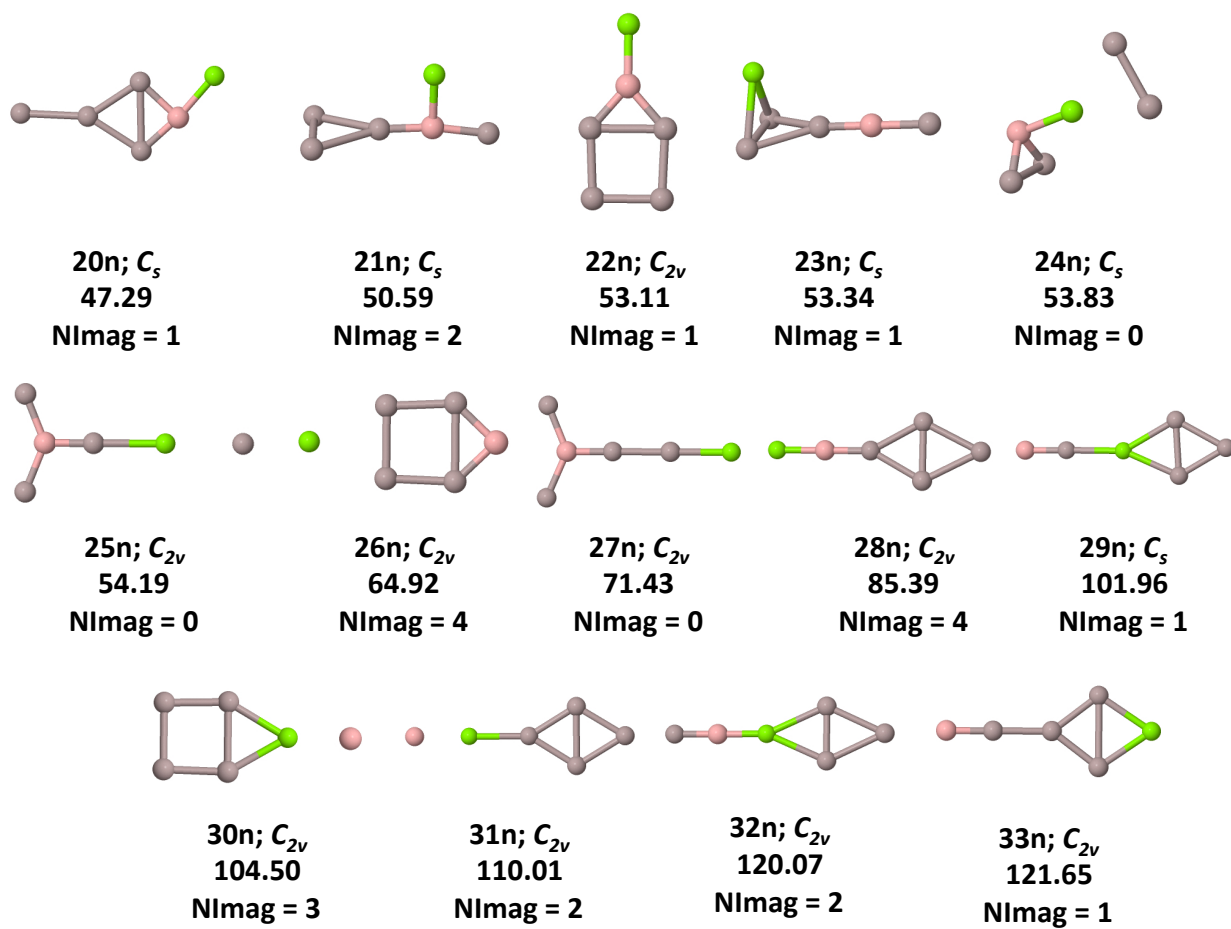

Figure S6: Isomers **20n-33n** of  $BA_{14}Mg$  in their respective doublet ground electronic states. ZPVE-corrected relative energies (in  $\text{kcal mol}^{-1}$ ) are calculated at the  $U\omega B97XD/6-311++G(2d,2p)$  level of theory.

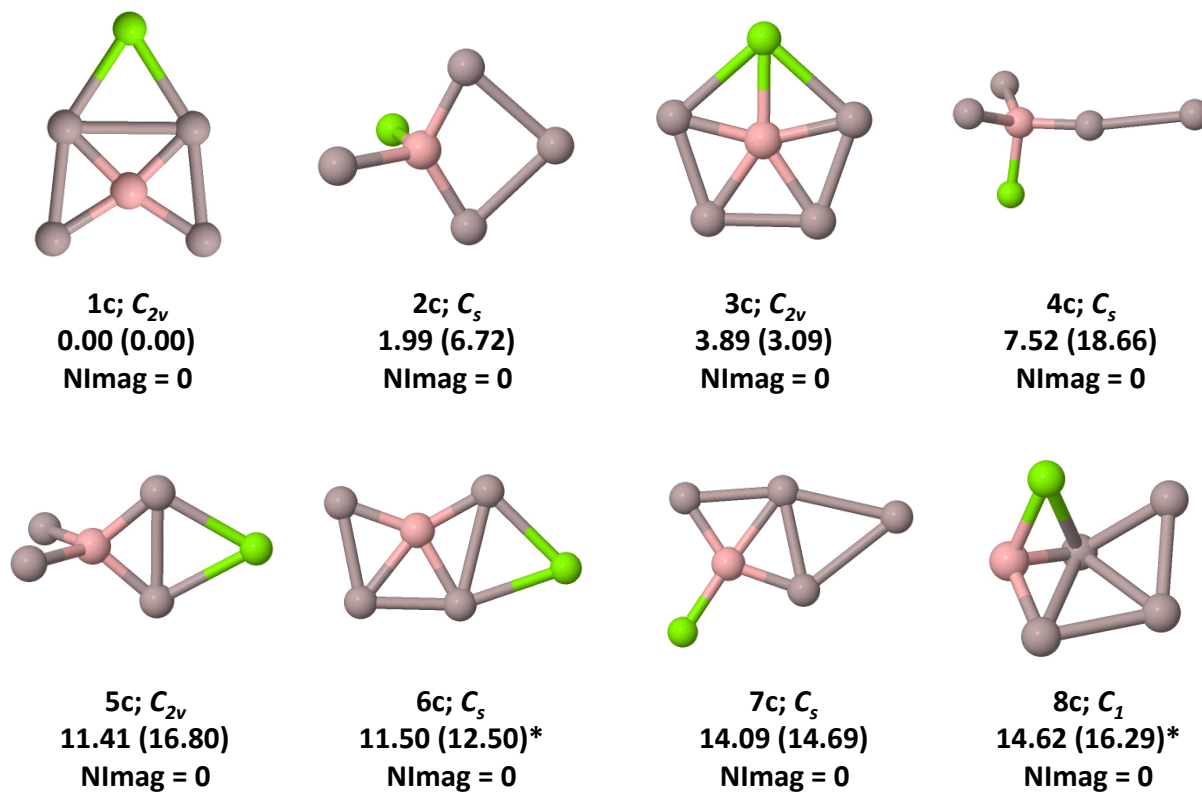

Figure S7: Isomers **1c-8c** of  $\text{BAI}_4\text{Mg}^+$  in their respective singlet ground electronic states. ZPVE-corrected relative energies (in  $\text{kcal mol}^{-1}$ ) are calculated at the  $\omega\text{B97XD}/6\text{-}311++\text{G}(2\text{d},2\text{p})$  level of theory. Relative energies obtained at the CBS-QB3 level are shown in parentheses.



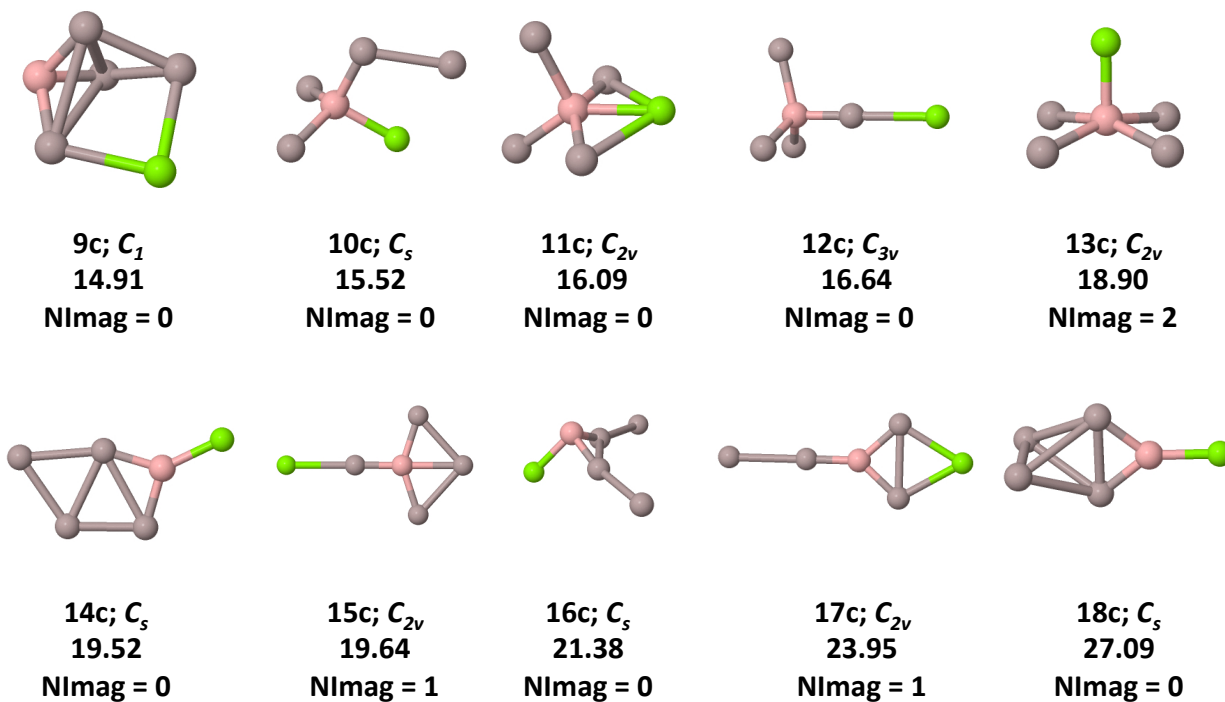

Figure S8: Isomers **9c-18c** of  $\text{BaAl}_4\text{Mg}^+$  in their respective singlet ground electronic states. ZPVE-corrected relative energies (in  $\text{kcal mol}^{-1}$ ) are calculated at the  $\omega\text{B97XD}/6\text{-311++G}(2\text{d},2\text{p})$  level of theory.

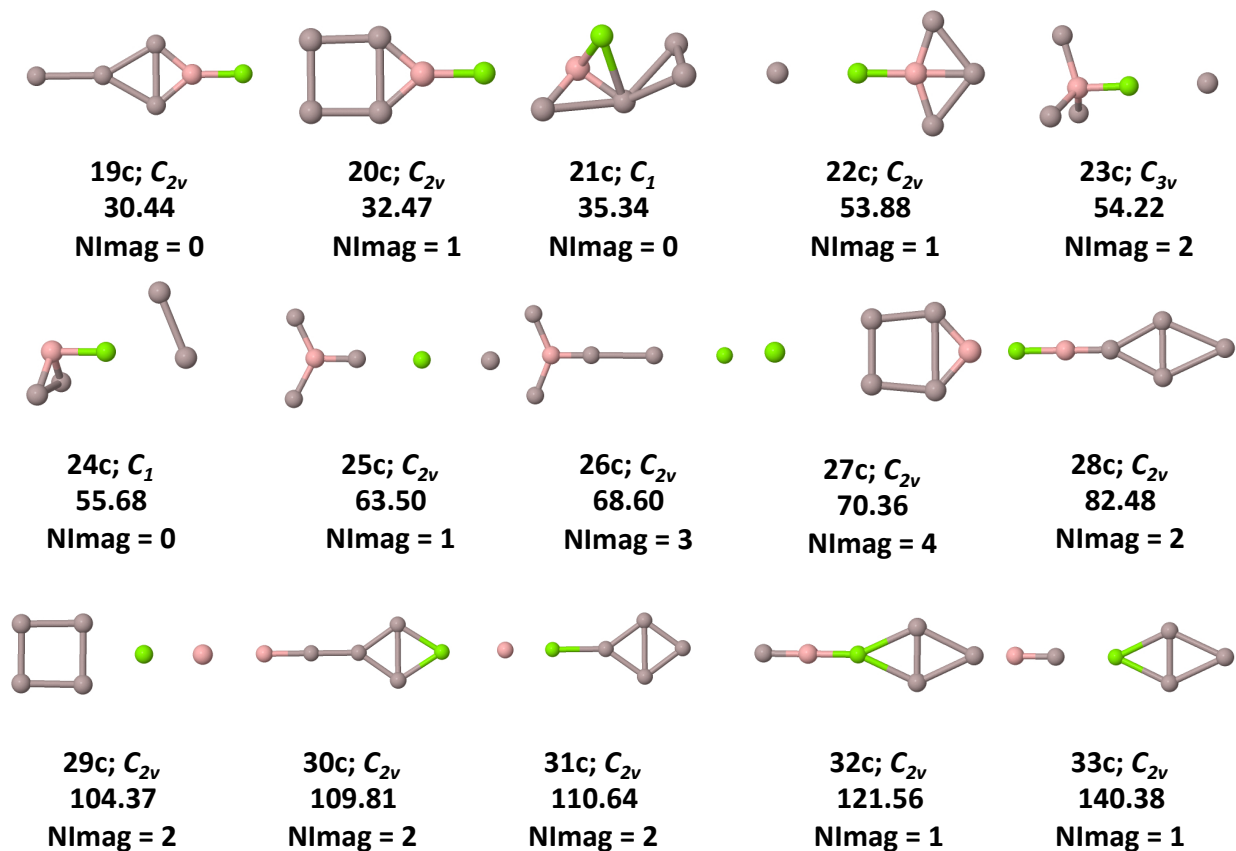

Figure S9: Isomers **19c-33c** of  $\text{BaAl}_4\text{Mg}^+$  in their respective singlet ground electronic states. ZPVE-corrected relative energies (in  $\text{kcal mol}^{-1}$ ) are calculated at the  $\omega\text{B97XD}/6\text{-}311++\text{G}(2\text{d},2\text{p})$  level of theory.

Table S1: Total energy ( $E$ ), zero-point vibrational energy ( $ZPVE$ ),  $ZPVE$ -corrected total energy ( $E+ZPVE$ ), net dipole moment ( $\mu$ ), relative energy without  $ZPVE$ -correction ( $\Delta E_e$ ),  $ZPVE$ -corrected relative energy ( $\Delta E_0$ ), and number of imaginary frequencies of  $\text{BaI}_4\text{Mg}^-$  isomers in their respective singlet ground electronic states calculated at the  $\omega\text{B97XD}/6\text{-311++G}(2\text{d},2\text{p})$  level of theory.

| Isomer     | $E$           | $ZPVE$   | $E+ZPVE$     | $\mu$ | $\Delta E_e$           | $\Delta E_0$ | NImag |
|------------|---------------|----------|--------------|-------|------------------------|--------------|-------|
|            | a.u           |          |              | Debye | kcal mol <sup>-1</sup> |              |       |
| <b>1a</b>  | -1194.6156199 | 0.007695 | -1194.607925 | 4.98  | 0.00                   | 0.00         | 0     |
| <b>2a</b>  | -1194.6150628 | 0.007872 | -1194.607191 | 2.71  | 0.35                   | 0.46         | 0     |
| <b>3a</b>  | -1194.6080430 | 0.007245 | -1194.600798 | 1.95  | 4.75                   | 4.47         | 0     |
| <b>4a</b>  | -1194.5884849 | 0.007786 | -1194.580699 | 3.25  | 17.03                  | 17.09        | 0     |
| <b>5a</b>  | -1194.5848979 | 0.006450 | -1194.578448 | 1.90  | 19.28                  | 18.50        | 1     |
| <b>6a</b>  | -1194.5841398 | 0.007403 | -1194.576737 | 1.62  | 19.75                  | 19.57        | 0     |
| <b>7a</b>  | -1194.5833045 | 0.007010 | -1194.576295 | 0.91  | 20.28                  | 19.85        | 1     |
| <b>8a</b>  | -1194.5829304 | 0.007004 | -1194.575927 | 0.91  | 20.51                  | 20.08        | 1     |
| <b>9a</b>  | -1194.5813822 | 0.007030 | -1194.574352 | 4.86  | 21.48                  | 21.06        | 1     |
| <b>10a</b> | -1194.5811322 | 0.007135 | -1194.573997 | 3.94  | 21.64                  | 21.29        | 1     |
| <b>11a</b> | -1194.5772924 | 0.007471 | -1194.569821 | 3.27  | 24.05                  | 23.91        | 0     |
| <b>12a</b> | -1194.5747421 | 0.007083 | -1194.567659 | 1.09  | 25.65                  | 25.27        | 3     |
| <b>13a</b> | -1194.5651873 | 0.006828 | -1194.55836  | 0.93  | 31.65                  | 31.11        | 0     |
| <b>14a</b> | -1194.5636561 | 0.007667 | -1194.555989 | 1.75  | 32.61                  | 32.59        | 0     |
| <b>15a</b> | -1194.5524624 | 0.006734 | -1194.545729 | 6.02  | 39.63                  | 39.03        | 0     |
| <b>16a</b> | -1194.5523552 | 0.007644 | -1194.544711 | 7.17  | 39.70                  | 39.67        | 2     |
| <b>17a</b> | -1194.5499537 | 0.006336 | -1194.543618 | 5.65  | 41.21                  | 40.36        | 2     |
| <b>18a</b> | -1194.5430381 | 0.006968 | -1194.53607  | 2.05  | 45.55                  | 45.09        | 0     |
| <b>19a</b> | -1194.5405068 | 0.007294 | -1194.533213 | 2.11  | 47.13                  | 46.88        | 0     |
| <b>20a</b> | -1194.5351146 | 0.006919 | -1194.528196 | 4.02  | 50.52                  | 50.03        | 1     |
| <b>21a</b> | -1194.5319045 | 0.006665 | -1194.525239 | 11.37 | 52.53                  | 51.88        | 1     |
| <b>22a</b> | -1194.5133046 | 0.009089 | -1194.504215 | 5.93  | 64.20                  | 65.07        | 0     |
| <b>23a</b> | -1194.5077799 | 0.006672 | -1194.501108 | 5.05  | 67.67                  | 67.03        | 0     |
| <b>24a</b> | -1194.5065692 | 0.007086 | -1194.499484 | 4.08  | 68.43                  | 68.05        | 2     |
| <b>25a</b> | -1194.5021766 | 0.006150 | -1194.496027 | 5.23  | 71.19                  | 70.22        | 0     |
| <b>26a</b> | -1194.4881854 | 0.006681 | -1194.481504 | 2.33  | 79.97                  | 79.33        | 3     |
| <b>27a</b> | -1194.4863652 | 0.006611 | -1194.479755 | 8.96  | 81.11                  | 80.43        | 1     |
| <b>28a</b> | -1194.4756250 | 0.006479 | -1194.469146 | 3.29  | 87.85                  | 87.09        | 3     |
| <b>29a</b> | -1194.4358077 | 0.005000 | -1194.430808 | 4.50  | 112.83                 | 111.14       | 2     |
| <b>30a</b> | -1194.4354175 | 0.005750 | -1194.429667 | 6.22  | 113.08                 | 111.86       | 3     |
| <b>31a</b> | -1194.4321770 | 0.004668 | -1194.427509 | 2.82  | 115.11                 | 113.21       | 1     |
| <b>32a</b> | -1194.3961804 | 0.005499 | -1194.390682 | 5.00  | 137.70                 | 136.32       | 3     |
| <b>33a</b> | -1194.3676189 | 0.005490 | -1194.362129 | 9.58  | 155.62                 | 154.24       | 1     |

Table S2: Total energy ( $E$ ), zero-point vibrational energy ( $ZPVE$ ),  $ZPVE$ -corrected total energy ( $E+ZPVE$ ), net dipole moment ( $\mu$ ), relative energy without  $ZPVE$ -correction ( $\Delta E_e$ ),  $ZPVE$ -corrected relative energy ( $\Delta E_0$ ), and number of imaginary frequencies of  $\text{BaAl}_4\text{Mg}$  isomers in their respective doublet ground electronic states calculated at the  $\text{U}\omega\text{B97XD}/6\text{-311++G}(2\text{d},2\text{p})$  level of theory.

| Isomer     | $E$           | $ZPVE$   | $E+ZPVE$     | $\mu$ | $\Delta E_e$           | $\Delta E_0$ | NImag | $\langle S^2 \rangle$ |
|------------|---------------|----------|--------------|-------|------------------------|--------------|-------|-----------------------|
|            | a.u           |          |              | Debye | kcal mol <sup>-1</sup> |              |       |                       |
| <b>1n</b>  | -1194.5336974 | 0.007292 | -1194.526406 | 6.03  | 0.00                   | 0.00         | 0     | 0.797305              |
| <b>2n</b>  | -1194.5257394 | 0.007321 | -1194.518418 | 1.63  | 4.99                   | 5.01         | 0     | 0.758181              |
| <b>3n</b>  | -1194.5246042 | 0.007512 | -1194.517092 | 5.21  | 5.71                   | 5.85         | 0     | 0.807541              |
| <b>4n</b>  | -1194.5186755 | 0.008075 | -1194.510601 | 3.25  | 9.43                   | 9.92         | 0     | 0.796030              |
| <b>5n</b>  | -1194.5125226 | 0.007613 | -1194.504910 | 3.41  | 13.29                  | 13.49        | 0     | 0.774463              |
| <b>6n</b>  | -1194.5106080 | 0.007073 | -1194.503535 | 6.22  | 14.49                  | 14.35        | 0     | 0.762152              |
| <b>7n</b>  | -1194.5089735 | 0.007202 | -1194.501772 | 4.66  | 15.51                  | 15.45        | 0     | 0.905247              |
| <b>8n</b>  | -1194.5063576 | 0.007294 | -1194.499064 | 3.00  | 17.16                  | 17.16        | 0     | 0.931497              |
| <b>9n</b>  | -1194.4995268 | 0.005016 | -1194.494511 | 1.96  | 21.44                  | 20.01        | 3     | 1.180257              |
| <b>10n</b> | -1194.4995693 | 0.006731 | -1194.492838 | 1.70  | 21.42                  | 21.07        | 1     | 0.785372              |
| <b>11n</b> | -1194.5004499 | 0.007725 | -1194.492725 | 4.06  | 20.86                  | 21.13        | 0     | 0.834877              |
| <b>12n</b> | -1194.4990253 | 0.007787 | -1194.491239 | 2.16  | 21.76                  | 22.07        | 0     | 0.814272              |
| <b>13n</b> | -1194.4790494 | 0.007072 | -1194.471978 | 2.18  | 34.29                  | 34.15        | 1     | 1.485627              |
| <b>14n</b> | -1194.4784580 | 0.006948 | -1194.47151  | 1.45  | 34.66                  | 34.44        | 2     | 0.810084              |
| <b>15n</b> | -1194.4756012 | 0.006508 | -1194.469093 | 5.17  | 36.46                  | 35.97        | 1     | 0.934291              |
| <b>16n</b> | -1194.4746819 | 0.006869 | -1194.467813 | 9.39  | 37.03                  | 36.76        | 0     | 0.815897              |
| <b>17n</b> | -1194.4714365 | 0.005200 | -1194.466236 | 3.47  | 39.07                  | 37.76        | 2     | 1.735140              |
| <b>18n</b> | -1194.4723819 | 0.007101 | -1194.465281 | 4.04  | 38.48                  | 38.36        | 2     | 1.651501              |
| <b>19n</b> | -1194.4593909 | 0.006787 | -1194.452604 | 1.72  | 46.63                  | 46.31        | 1     | 1.285082              |
| <b>20n</b> | -1194.4535963 | 0.006255 | -1194.447342 | 5.37  | 50.26                  | 49.61        | 2     | 0.767085              |
| <b>21n</b> | -1194.4535129 | 0.010194 | -1194.443319 | 5.32  | 50.32                  | 52.14        | 1     | 0.822814              |
| <b>22n</b> | -1194.4487132 | 0.005763 | -1194.44295  | 7.41  | 53.33                  | 52.37        | 0     | 1.776772              |
| <b>23n</b> | -1194.4488860 | 0.006715 | -1194.442171 | 1.80  | 53.22                  | 52.86        | 0     | 0.765920              |
| <b>24n</b> | -1194.4486190 | 0.007011 | -1194.441608 | 7.75  | 53.39                  | 53.21        | 0     | 0.895698              |
| <b>25n</b> | -1194.4305410 | 0.006042 | -1194.424499 | 4.25  | 64.73                  | 63.95        | 4     | 0.786752              |
| <b>26n</b> | -1194.4211906 | 0.007055 | -1194.414135 | 11.93 | 70.60                  | 70.45        | 0     | 1.596845              |
| <b>27n</b> | -1194.3970563 | 0.005177 | -1194.391879 | 9.46  | 85.74                  | 84.41        | 4     | 1.697244              |
| <b>28n</b> | -1194.3713196 | 0.005837 | -1194.365483 | 4.88  | 101.89                 | 100.98       | 1     | 2.742919              |
| <b>29n</b> | -1194.3663925 | 0.004968 | -1194.361425 | 3.31  | 104.99                 | 103.53       | 3     | 1.058016              |
| <b>30n</b> | -1194.3577752 | 0.005120 | -1194.352655 | 0.77  | 110.39                 | 109.03       | 2     | 0.773237              |
| <b>31n</b> | -1194.3425329 | 0.005918 | -1194.336615 | 0.21  | 119.96                 | 119.10       | 2     | 1.011501              |
| <b>32n</b> | -1194.3528095 | 0.018716 | -1194.334094 | 8.47  | 113.51                 | 120.68       | 1     | 2.782482              |

Table S3: Total energy ( $E$ ), zero-point vibrational energy ( $ZPVE$ ),  $ZPVE$ -corrected total energy ( $E+ZPVE$ ), net dipole moment ( $\mu$ ), relative energy without  $ZPVE$ -correction ( $\Delta E_e$ ),  $ZPVE$ -corrected relative energy ( $\Delta E_0$ ), and number of imaginary frequencies of  $\text{BaI}_4\text{Mg}^+$  isomers in their respective singlet ground electronic states calculated at the  $\omega\text{B97XD}/6\text{-311++G}(2\text{d},2\text{p})$  level of theory.

| Isomer     | $E$           | $ZPVE$   | $E+ZPVE$     | $\mu$ | $\Delta E_e$           | $\Delta E_0$ | NImag |
|------------|---------------|----------|--------------|-------|------------------------|--------------|-------|
|            | a.u           |          |              | Debye | kcal mol <sup>-1</sup> |              |       |
| <b>1c</b>  | -1194.3105651 | 0.007701 | -1194.302864 | 6.11  | 0.00                   | 0.00         | 0     |
| <b>2c</b>  | -1194.3066723 | 0.006981 | -1194.299691 | 5.96  | 2.44                   | 1.99         | 0     |
| <b>3c</b>  | -1194.3041293 | 0.007469 | -1194.296660 | 4.42  | 4.04                   | 3.89         | 0     |
| <b>4c</b>  | -1194.2976791 | 0.006794 | -1194.290885 | 6.41  | 8.09                   | 7.52         | 0     |
| <b>5c</b>  | -1194.2922057 | 0.007517 | -1194.284688 | 7.59  | 11.52                  | 11.40        | 0     |
| <b>6c</b>  | -1194.2922500 | 0.007785 | -1194.284465 | 6.08  | 11.49                  | 11.54        | 0     |
| <b>7c</b>  | -1194.2875655 | 0.007155 | -1194.280410 | 7.67  | 14.43                  | 14.09        | 0     |
| <b>8c</b>  | -1194.2876975 | 0.008136 | -1194.279562 | 3.27  | 14.35                  | 14.62        | 0     |
| <b>9c</b>  | -1194.2874644 | 0.008348 | -1194.279117 | 4.7   | 14.50                  | 14.91        | 0     |
| <b>10c</b> | -1194.2849899 | 0.006861 | -1194.278129 | 4.79  | 16.05                  | 15.52        | 0     |
| <b>11c</b> | -1194.2835385 | 0.006308 | -1194.277230 | 4.02  | 16.96                  | 16.09        | 0     |
| <b>12c</b> | -1194.2829208 | 0.006576 | -1194.276345 | 12.03 | 17.35                  | 16.64        | 0     |
| <b>13c</b> | -1194.2769276 | 0.004176 | -1194.272752 | 6.46  | 21.11                  | 18.90        | 2     |
| <b>14c</b> | -1194.2790827 | 0.007320 | -1194.271763 | 8.05  | 19.76                  | 19.52        | 0     |
| <b>15c</b> | -1194.2781299 | 0.006562 | -1194.271568 | 13.26 | 20.35                  | 19.64        | 1     |
| <b>16c</b> | -1194.2758487 | 0.007060 | -1194.268789 | 4.05  | 21.78                  | 21.38        | 0     |
| <b>17c</b> | -1194.2719989 | 0.007298 | -1194.264701 | 2.09  | 24.20                  | 23.95        | 1     |
| <b>18c</b> | -1194.2666647 | 0.006970 | -1194.259695 | 7.01  | 27.55                  | 27.09        | 0     |
| <b>19c</b> | -1194.2615976 | 0.007246 | -1194.254352 | 5.69  | 30.73                  | 30.44        | 0     |
| <b>20c</b> | -1194.2588454 | 0.007739 | -1194.251107 | 7.14  | 32.45                  | 32.47        | 1     |
| <b>21c</b> | -1194.2534199 | 0.006869 | -1194.246551 | 3.24  | 35.86                  | 35.34        | 0     |
| <b>22c</b> | -1194.2257063 | 0.008702 | -1194.217005 | 7.44  | 53.25                  | 53.88        | 1     |
| <b>23c</b> | -1194.2226979 | 0.006236 | -1194.216462 | 11.31 | 55.14                  | 54.22        | 2     |
| <b>24c</b> | -1194.2203676 | 0.006238 | -1194.214130 | 8.05  | 56.60                  | 55.68        | 0     |
| <b>25c</b> | -1194.2066849 | 0.005008 | -1194.201677 | 9.09  | 65.19                  | 63.50        | 1     |
| <b>26c</b> | -1194.1977622 | 0.004225 | -1194.193537 | 12.0  | 70.78                  | 68.60        | 3     |
| <b>27c</b> | -1194.1967993 | 0.006054 | -1194.190746 | 4.39  | 71.39                  | 70.36        | 4     |
| <b>28c</b> | -1194.1773282 | 0.005907 | -1194.171421 | 10.73 | 83.61                  | 82.48        | 2     |
| <b>29c</b> | -1194.1411329 | 0.004597 | -1194.136536 | 1.15  | 106.32                 | 104.37       | 2     |
| <b>30c</b> | -1194.1333514 | 0.005488 | -1194.127864 | 2.62  | 111.20                 | 109.81       | 2     |
| <b>31c</b> | -1194.1315951 | 0.005040 | -1194.126555 | 0.31  | 112.31                 | 110.64       | 2     |
| <b>32c</b> | -1194.1141220 | 0.004983 | -1194.109138 | 4.53  | 123.27                 | 121.56       | 1     |
| <b>33c</b> | -1194.0839056 | 0.004758 | -1194.079148 | 2.74  | 142.23                 | 140.38       | 1     |

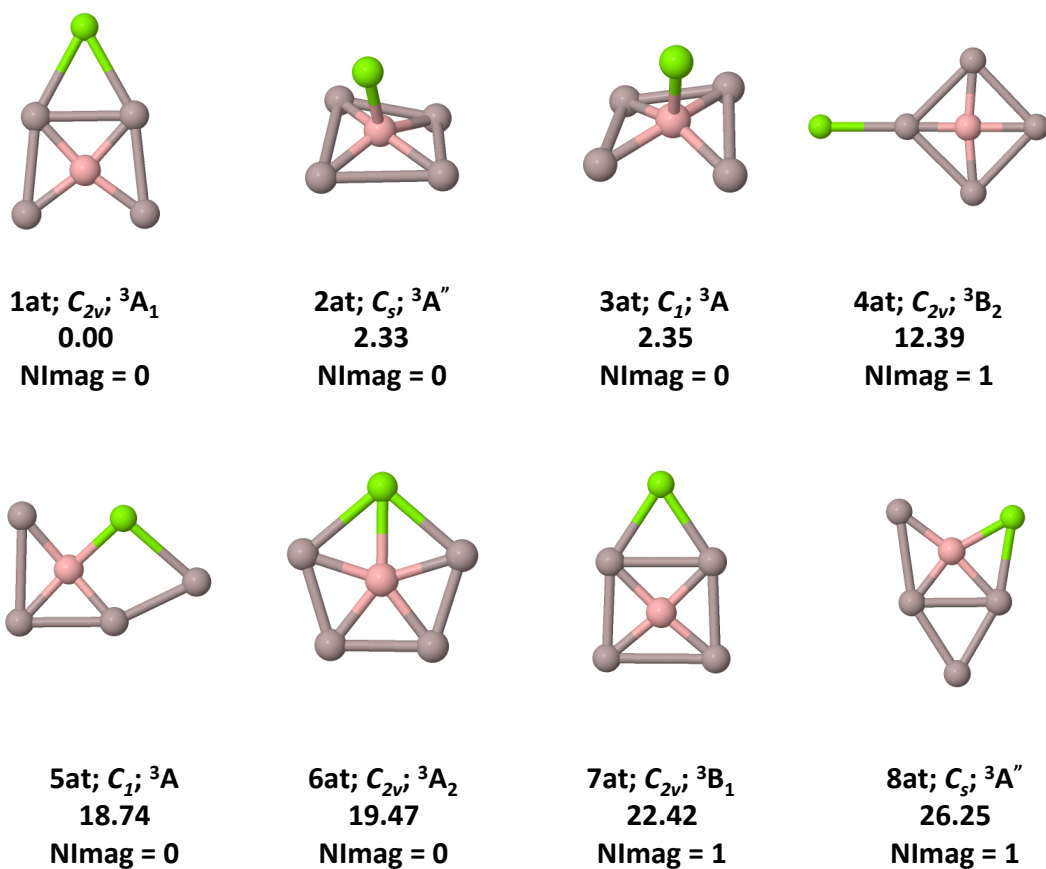

Figure S10: Isomers **1at-8at** of  $BA_4Mg^-$  in their respective triplet ground electronic states. ZPVE-corrected relative energies (in  $\text{kcal mol}^{-1}$ ) are calculated at the  $U\omega B97XD/6-311++G(2d,2p)$  level of theory.

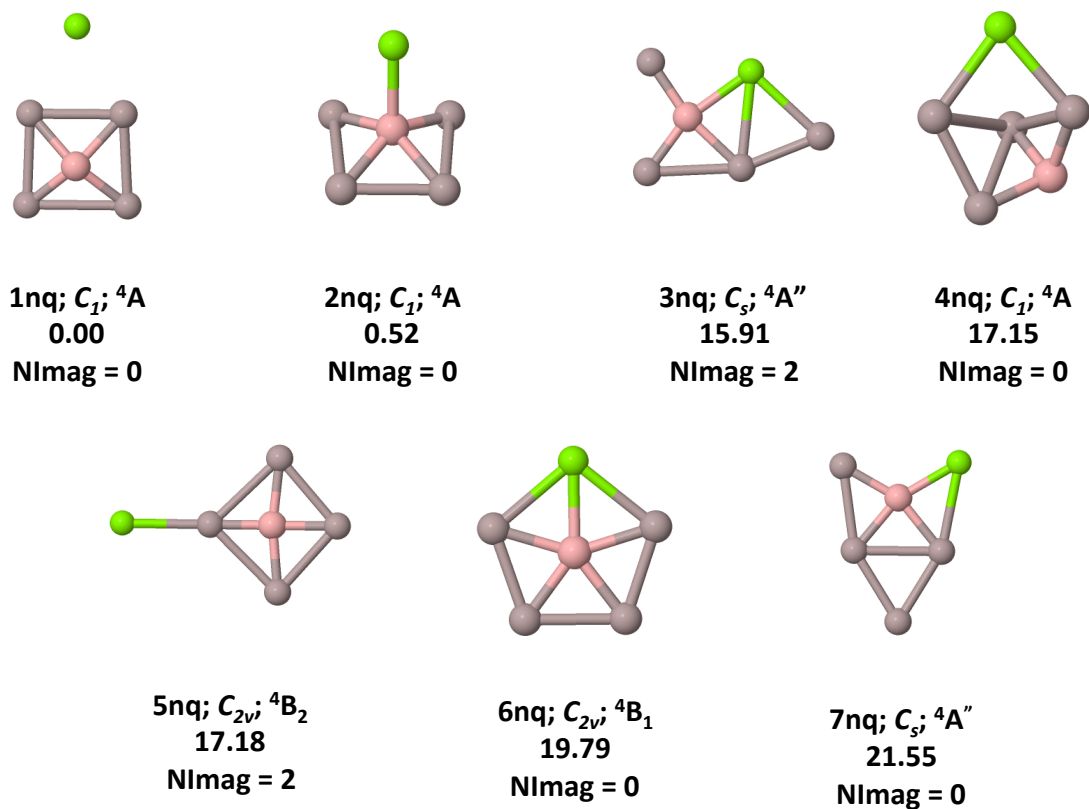

Figure S11: Isomers **1nq-7nq** of  $BA1_4Mg$  in their respective quartet ground electronic states. ZPVE-corrected relative energies (in  $\text{kcal mol}^{-1}$ ) are calculated at the  $U\omega B97XD/6-311++G(2d,2p)$  level of theory.

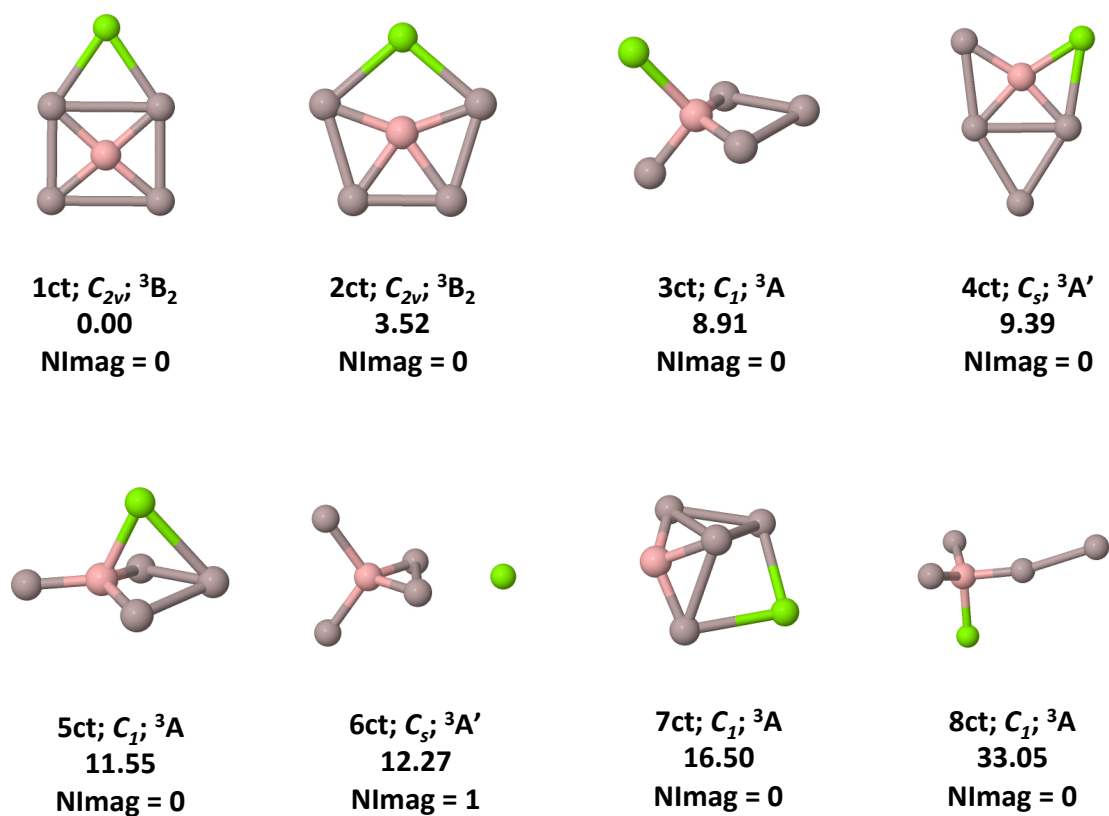

Figure S12: Isomers **1ct-8ct** of  $BAI_4Mg^+$  in their respective triplet ground electronic states. ZPVE-corrected relative energies (in  $\text{kcal mol}^{-1}$ ) are calculated at the  $U\omega B97XD/6-311++G(2d,2p)$  level of theory.



Table S4: Total energy ( $E$ ), zero-point vibrational energy ( $ZPVE$ ),  $ZPVE$ -corrected total energy ( $E+ZPVE$ ), net dipole moment ( $\mu$ ), relative energy without ZPVE-correction ( $\Delta E_e$ ), ZPVE-corrected relative energy ( $\Delta E_0$ ), and number of imaginary frequencies of  $\text{BAl}_4\text{Mg}^-$  isomers in their respective triplet ground electronic states calculated at the  $\text{U}\omega\text{B97XD}/6\text{-311++G(2d,2p)}$  level of theory.

| Isomer     | $E$           | $ZPVE$   | $E+ZPVE$     | $\mu$ | $\Delta E_e$           | $\Delta E_0$ | NImag | $< S^2 >$ |
|------------|---------------|----------|--------------|-------|------------------------|--------------|-------|-----------|
|            | a.u           |          |              | Debye | kcal mol <sup>-1</sup> |              |       |           |
| <b>1at</b> | -1194.6090575 | 0.007308 | -1194.601749 | 1.61  | 0.0                    | 0.0          | 0     | 2.040891  |
| <b>2at</b> | -1194.6048604 | 0.006832 | -1194.598028 | 2.32  | 2.63                   | 2.33         | 0     | 2.035347  |
| <b>3at</b> | -1194.6048616 | 0.006851 | -1194.598010 | 2.32  | 2.63                   | 2.35         | 0     | 2.035546  |
| <b>4at</b> | -1194.5888312 | 0.00683  | -1194.582001 | 5.82  | 12.69                  | 12.39        | 1     | 2.042446  |
| <b>5at</b> | -1194.5789162 | 0.007026 | -1194.571890 | 3.50  | 18.91                  | 18.74        | 0     | 2.054027  |
| <b>6at</b> | -1194.5787969 | 0.008081 | -1194.570716 | 1.71  | 18.99                  | 19.47        | 0     | 2.086528  |
| <b>7at</b> | -1194.573345  | 0.007326 | -1194.566019 | 3.98  | 22.41                  | 22.42        | 1     | 2.070890  |
| <b>8at</b> | -1194.5674607 | 0.007539 | -1194.559922 | 3.28  | 26.10                  | 26.25        | 1     | 2.030094  |

Table S5: Total energy ( $E$ ), zero-point vibrational energy ( $ZPVE$ ),  $ZPVE$ -corrected total energy ( $E+ZPVE$ ), net dipole moment ( $\mu$ ), relative energy without ZPVE-correction ( $\Delta E_e$ ), ZPVE-corrected relative energy ( $\Delta E_0$ ), and number of imaginary frequencies of  $\text{BaAl}_4\text{Mg}$  isomers in their respective quartet ground electronic states calculated at the  $\text{U}\omega\text{B97XD}/6\text{-}311++\text{G}(2\text{d},2\text{p})$  level of theory.

| Isomer     | $E$           | $ZPVE$   | $E+ZPVE$     | $\mu$ | $\Delta E_e$           | $\Delta E_0$ | NImag | $< S^2 >$ |
|------------|---------------|----------|--------------|-------|------------------------|--------------|-------|-----------|
|            | a.u           |          |              | Debye | kcal mol <sup>-1</sup> |              |       |           |
| <b>1nq</b> | -1194.5186133 | 0.007083 | -1194.511530 | 0.63  | 0.00                   | 0.00         | 0     | 3.792889  |
| <b>2nq</b> | -1194.5172344 | 0.006522 | -1194.510713 | 1.73  | 0.87                   | 0.52         | 0     | 3.803457  |
| <b>3nq</b> | -1194.4928275 | 0.006652 | -1194.486176 | 2.34  | 16.18                  | 15.91        | 2     | 3.792782  |
| <b>4nq</b> | -1194.4917139 | 0.007506 | -1194.484208 | 3.71  | 16.88                  | 17.15        | 0     | 3.791863  |
| <b>5nq</b> | -1194.4920503 | 0.007901 | -1194.484149 | 4.04  | 16.67                  | 17.18        | 2     | 3.788159  |
| <b>6nq</b> | -1194.4875504 | 0.007567 | -1194.479983 | 2.71  | 19.49                  | 19.79        | 0     | 3.836763  |
| <b>7nq</b> | -1194.4851523 | 0.007954 | -1194.477198 | 5.02  | 21.00                  | 21.55        | 0     | 3.899811  |

Table S6: Total energy ( $E$ ), zero-point vibrational energy ( $ZPVE$ ),  $ZPVE$ -corrected total energy ( $E+ZPVE$ ), net dipole moment ( $\mu$ ), relative energy without ZPVE-correction ( $\Delta E_e$ ), ZPVE-corrected relative energy ( $\Delta E_0$ ), and number of imaginary frequencies of  $\text{BaI}_4\text{Mg}^+$  isomers in their respective triplet ground electronic states calculated at the  $\text{U}\omega\text{B97XD}/6\text{-311++G}(2\text{d},2\text{p})$  level of theory.

| Isomer     | $E$           | $ZPVE$   | $E+ZPVE$     | $\mu$ | $\Delta E_e$           | $\Delta E_0$ | NImag | $< S^2 >$ |
|------------|---------------|----------|--------------|-------|------------------------|--------------|-------|-----------|
|            | a.u           |          |              | Debye | kcal mol <sup>-1</sup> |              |       |           |
| <b>1ct</b> | -1194.3112215 | 0.007210 | -1194.304012 | 5.01  | 0.00                   | 0.00         | 0     | 2.035598  |
| <b>2ct</b> | -1194.3053276 | 0.006924 | -1194.298403 | 3.43  | 3.70                   | 3.52         | 0     | 2.064882  |
| <b>3ct</b> | -1194.2965511 | 0.006726 | -1194.289825 | 1.14  | 9.21                   | 8.91         | 0     | 2.019328  |
| <b>4ct</b> | -1194.2966025 | 0.007560 | -1194.289042 | 5.23  | 9.17                   | 9.39         | 0     | 2.037799  |
| <b>5ct</b> | -1194.2923763 | 0.006762 | -1194.285614 | 3.20  | 11.83                  | 11.55        | 0     | 2.028067  |
| <b>6ct</b> | -1194.2909792 | 0.006527 | -1194.284452 | 6.49  | 12.70                  | 12.27        | 1     | 2.013184  |
| <b>7ct</b> | -1194.2852007 | 0.007479 | -1194.277722 | 4.47  | 16.33                  | 16.50        | 0     | 2.049800  |
| <b>8ct</b> | -1194.2580803 | 0.006726 | -1194.251354 | 6.13  | 33.35                  | 33.05        | 0     | 2.039504  |

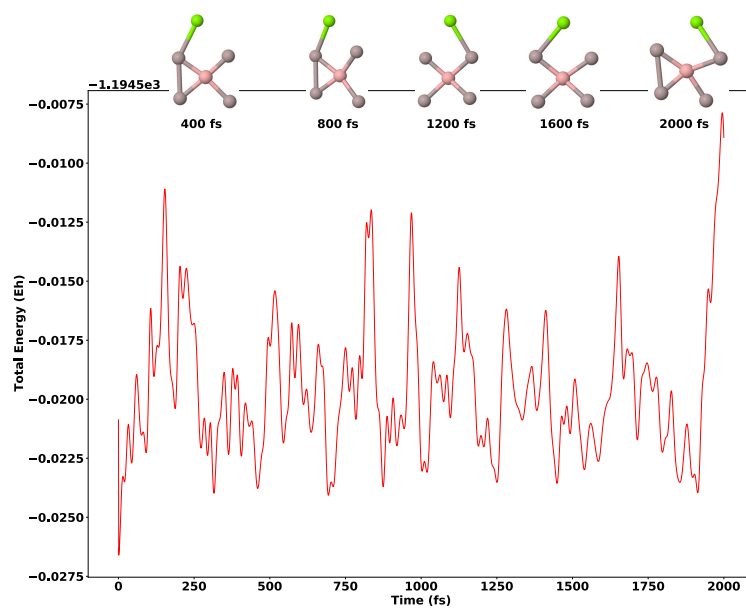

Figure S13: Energy evolution of ptB BA1<sub>4</sub>Mg (**2n**) at 298 K for 2000 fs time in the ADMP simulation performed at the U $\omega$ B97XD/6-311++G(2d,2p) level.

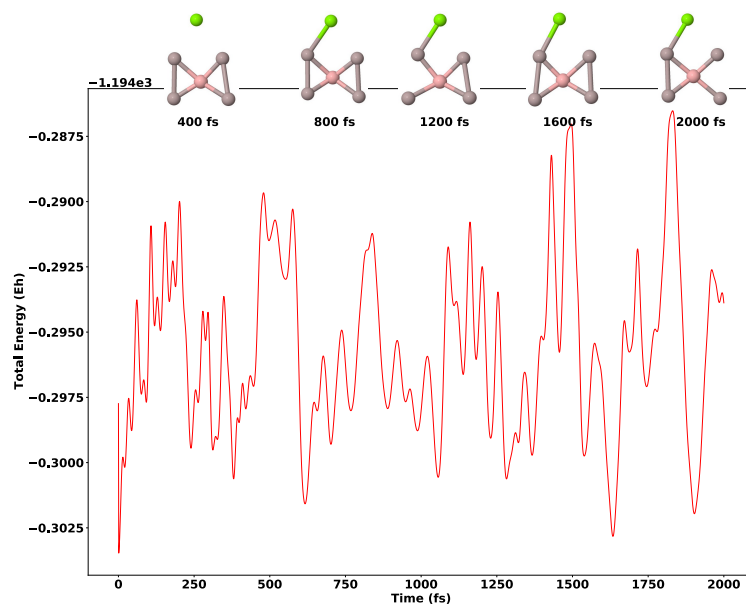

Figure S14: Energy evolution of ptB BA1<sub>4</sub>Mg<sup>+</sup> (**1c**) at 298 K for 2000 fs time in the ADMP simulation performed at the  $\omega$ B97XD/6-311++G(2d,2p) level.

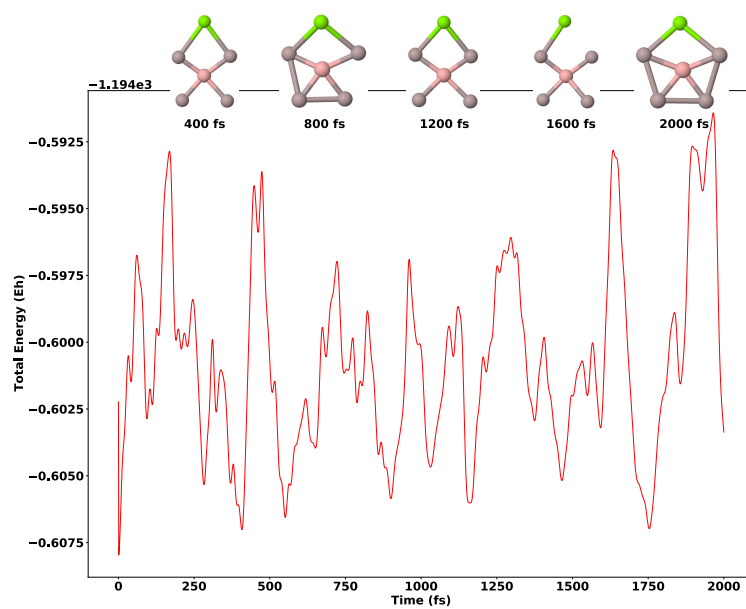

Figure S15: Energy evolution of ppB BA1<sub>4</sub>Mg<sup>-</sup> (**2a**) at 298 K for 2000 fs time in the ADMP simulation performed at the  $\omega$ B97XD/6-311++G(2d,2p).

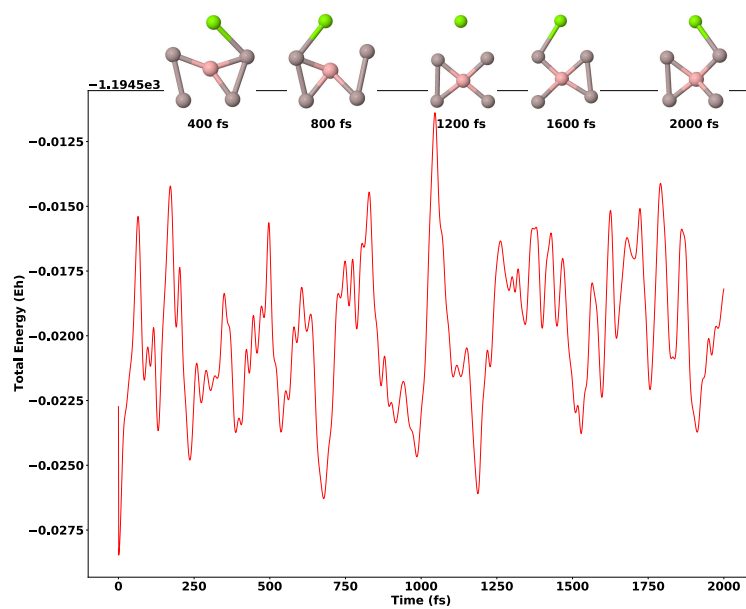

Figure S16: Energy evolution of ppB BA14Mg (**1n**) at 298 K for 2000 fs time in the ADMP simulation performed at the U $\omega$ B97XD/6-311++G(2d,2p) level.

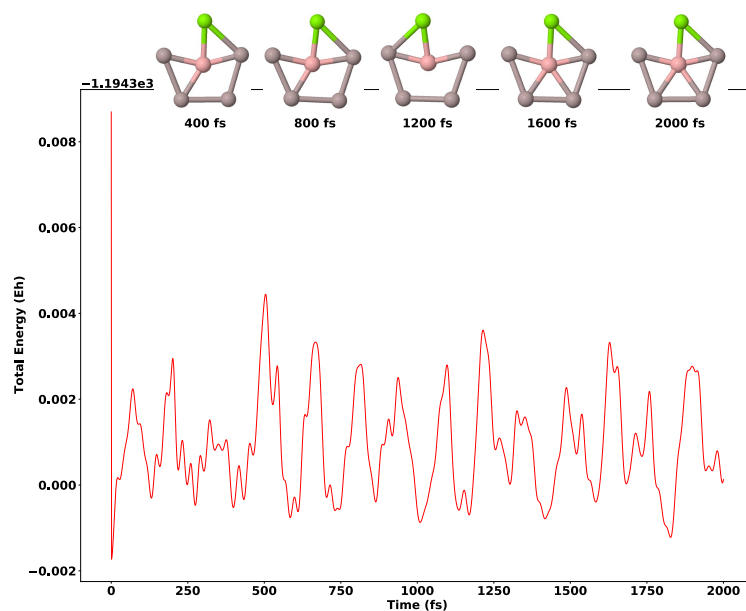

Figure S17: Energy evolution of ptB BA<sub>14</sub>Mg<sup>+</sup> (**3c**) at 100 K for 2000 fs time in the ADMP simulation performed at the  $\omega$ B97XD/6-311++G(2d,2p) level.



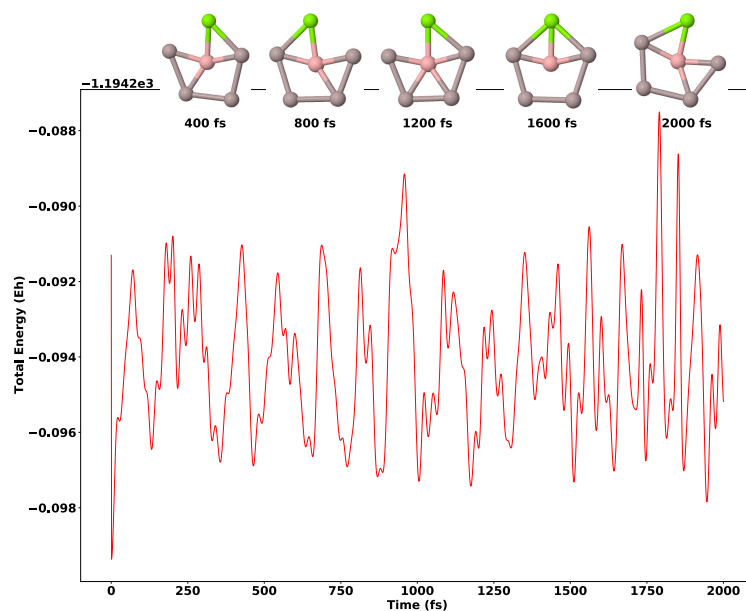

Figure S18: Energy evolution of ptB BA14Mg<sup>+</sup> (**3c**) at 200 K for 2000 fs time in the ADMP simulation performed at the  $\omega$ B97XD/6-311++G(2d,2p) level.

Table S7: Molecular orbital composition analysis by NAO method. Major atomic orbital contributions (%) are given

| Type | Species   | HOMO                                   | HOMO-1                                 | HOMO-2                                                     | HOMO-3                                | HOMO-4                            | LUMO                                 |
|------|-----------|----------------------------------------|----------------------------------------|------------------------------------------------------------|---------------------------------------|-----------------------------------|--------------------------------------|
| ptB  | <b>1n</b> | 1B(2p <sub>z</sub> 26.3)               | 1B(2p <sub>y</sub> 20.2)               | 2Mg(3s 22.6)                                               | 1B(2p <sub>x</sub> 65.5)              | (3,4)Al(3s                        | 2Mg(3s 21.0)                         |
|      |           | (5,6)Al(3p <sub>z</sub> 12.5)          | (5,6)Al(3s 15.3)                       | (3,4)Al(3s 8.6,<br>3p <sub>y/z</sub> 17.1)                 | (3,4)Al(3p <sub>x</sub> 10.2)         | 18.6, 3p <sub>z</sub> 11.7)       | (5,6)Al(3p <sub>y</sub> 10.3)        |
|      | <b>2n</b> | 1B(2p <sub>z</sub> 20.0)               | 1B(2p <sub>y</sub> 19.8)               | 2Mg(3s 19.0)                                               | 1B(2p <sub>x</sub> 68.6)              | (3,4)Al(3s                        | 2Mg(3s 33.9)                         |
|      |           | (5,6)Al(3s 9.6, 3p <sub>z</sub> 13.8)  | (5,6)Al(3s 19.3)                       | (3,4)Al(3s 5.2, 3p <sub>y/z</sub> 16.8)                    | (3,4)Al(3p <sub>x</sub> 10.7)         | 22.5, 3p <sub>z</sub> 10.7)       | (3,4)Al(3s 7.9, 3p <sub>z</sub> 7.0) |
|      | <b>1c</b> | 1B(2p <sub>y</sub> 21.6)               | 1B(2p <sub>x</sub> 67.6)               | 1B(2p <sub>z</sub> 15)                                     | (3,4)Al(3s 26.0, 3p <sub>z</sub> 9.8) | 1B(2s 13.0, 2p <sub>z</sub> 16.6) | 1B(2p <sub>z</sub> 9.6)              |
|      |           | (5,6)Al(3s 22.0)                       | (3,4)Al(3p <sub>x</sub> 12.0)          | 2Mg(3s 14.3)                                               | (5,6)Al(3s 9.4)                       | 2Mg(3s 15.7)                      | (3,4)Al(3p <sub>y</sub> 14.7)        |
|      |           |                                        |                                        | (3,4)Al(3p <sub>y/z</sub> 17.7)                            |                                       | (5,6)Al(3s 15.5)                  | (5,6)Al(3p <sub>z</sub> 13.7)        |
|      |           |                                        |                                        |                                                            |                                       |                                   |                                      |
|      | <b>2a</b> | 1B(2p <sub>z</sub> 29.3)               | 1B(2p <sub>y</sub> 23.4)               | 2Mg(3s 19.7)                                               | 1B(2p <sub>x</sub> 62.9)              | (3,4)Al(3s                        | 2Mg(3s 23.8)                         |
|      |           | 2Mg(3s 16.7)                           | (5,6)Al(3s 10.2)                       | (3,4)Al(3s 6.5, 3p <sub>y/z</sub> 13.2)                    | (3,4)Al(3p <sub>x</sub> 9.2)          | 15.9, 3p <sub>z</sub> 14.2)       | (5,6)Al(3p <sub>y</sub> 12.2)        |
| ppB  | <b>1n</b> | 1B(2p <sub>z</sub> 34.0)               | 1B(2p <sub>y</sub> 24.5)               | 2Mg(3s 20.9)                                               | 1B(2p <sub>x</sub> 66.9)              | (3,4)Al(3s                        | 2Mg(3s 35.9)                         |
|      |           | 2Mg(3s 13.9)                           | (3,4)Al(3s 10.7, 3p <sub>y</sub> 10.8) | (3,4)Al(3p <sub>z</sub> 8.0)                               | (3,4)Al(3p <sub>x</sub> 7.0)          | 12.5, 3p <sub>z</sub> 14.8)       | (5,6)Al(3p <sub>y</sub> 11.6)        |
|      | <b>3c</b> | 1B(2p <sub>y</sub> 23.6)               | 1B(2p <sub>x</sub> 69.4)               | 1B(2p <sub>z</sub> 10.5)                                   | (5,6)Al(3p <sub>x</sub> 8.8)          | (5,6)Al(3s 18.6)                  | 1B(2p <sub>z</sub> 23.8)             |
|      |           | (3,4)Al(3s 16.9, 3p <sub>z</sub> 10.1) | (3,4)Al(3p <sub>x</sub> 6.1)           | 2Mg(3s 14.3)                                               | (3,4)Al(3p <sub>z</sub> 14.4)         | 2Mg(3s 15.7)                      | 2Mg(3s 20.7)                         |
|      |           |                                        | (5,6)Al(3p <sub>x</sub> 8.3)           | (5,6)Al(3s 7.1, 3p <sub>y</sub> 7.9, 3p <sub>z</sub> 11.7) | (5,6)Al(3s 22.0)                      | (3,4)Al(3s 20.8)                  | (3,4)Al(3p <sub>z</sub> 9.1)         |
|      |           |                                        |                                        |                                                            |                                       |                                   |                                      |
|      | <b>2a</b> | 1B(2p <sub>z</sub> 29.3)               | 1B(2p <sub>y</sub> 23.4)               | 2Mg(3s 19.7)                                               | 1B(2p <sub>x</sub> 62.9)              | (3,4)Al(3s                        | 2Mg(3s 23.8)                         |
|      |           | 2Mg(3s 16.7)                           | (5,6)Al(3s 10.2)                       | (3,4)Al(3s 6.5, 3p <sub>y/z</sub> 13.2)                    | (3,4)Al(3p <sub>x</sub> 9.2)          | 15.9, 3p <sub>z</sub> 14.2)       | (5,6)Al(3p <sub>y</sub> 12.2)        |
|      | <b>1n</b> | 1B(2p <sub>z</sub> 34.0)               | 1B(2p <sub>y</sub> 24.5)               | 2Mg(3s 20.9)                                               | 1B(2p <sub>x</sub> 66.9)              | (3,4)Al(3s                        | 2Mg(3s 35.9)                         |
|      |           | 2Mg(3s 13.9)                           | (3,4)Al(3s 10.7, 3p <sub>y</sub> 10.8) | (3,4)Al(3p <sub>z</sub> 8.0)                               | (3,4)Al(3p <sub>x</sub> 7.0)          | 12.5, 3p <sub>z</sub> 14.8)       | (5,6)Al(3p <sub>y</sub> 11.6)        |
|      | <b>3c</b> | 1B(2p <sub>y</sub> 23.6)               | 1B(2p <sub>x</sub> 69.4)               | 1B(2p <sub>z</sub> 10.5)                                   | (5,6)Al(3p <sub>x</sub> 8.8)          | (5,6)Al(3s 18.6)                  | 1B(2p <sub>z</sub> 23.8)             |
|      |           | (3,4)Al(3s 16.9, 3p <sub>z</sub> 10.1) | (3,4)Al(3p <sub>x</sub> 6.1)           | 2Mg(3s 14.3)                                               | (3,4)Al(3p <sub>z</sub> 14.4)         | 2Mg(3s 15.7)                      | 2Mg(3s 20.7)                         |
|      |           |                                        | (5,6)Al(3p <sub>x</sub> 8.3)           | (5,6)Al(3s 7.1, 3p <sub>y</sub> 7.9, 3p <sub>z</sub> 11.7) | (5,6)Al(3s 22.0)                      | (3,4)Al(3s 20.8)                  | (3,4)Al(3p <sub>z</sub> 9.1)         |
|      |           |                                        |                                        |                                                            |                                       |                                   |                                      |

Optimized geometries of BAl4Mg<sup>-</sup> (singlet) obtained at the wB97XD/6-311++G(2d,2p) level

```

6
scf done: -1194.615620
  B      0.000000    -0.000000    -0.390761
Mg     -0.000000     0.000000     2.838681
Al     -0.000000     1.687714     0.713812
Al     -0.000000    -1.687714     0.713812
Al      0.000000     1.394426    -2.003367
Al      0.000000    -1.394426    -2.003367

```

```

6
scf done: -1194.615063
  B     -0.201305    -0.000000     1.000000
Mg      2.434306    -0.000000     1.000000
Al      0.626657     0.000000     2.909221
Al      0.626657    -0.000000    -0.909221
Al     -1.893157     0.000000     2.303229
Al     -1.893157    -0.000000    -0.303229

```

```

6
scf done: -1194.608043
  B      0.155774     0.606159     1.965698
Al      1.884890     0.655864     0.840966
Al      0.630554     0.424568     3.972205
Mg     -0.918066    -2.085923     4.096217
Al     -0.844924     2.381585     1.645537
Al     -1.028070    -0.980408     1.360919

```

```

6
scf done: -1194.588485
  B      0.000000     0.000000     0.000000
Al      0.000000     0.000000     2.130340
Al      2.529536    -0.000000     3.196310
Al      1.986775    -0.000000     0.495270
Al      0.606258     0.000000    -1.973659
Mg     -2.123508     0.000000     0.514726

```

```

7
scf done: -1194.584898
Al     -0.934321    -0.000000     1.000000
Mg      2.530897    -0.000000     1.000000
  B     -2.941742     0.000000     1.000000
Al     -3.546097     0.000000     2.926912
Al     -3.546097     0.000000    -0.926912
Al     -5.358408     0.000000     1.000000
XX     -0.934321    -0.000000     2.000000

```

```

6
scf done: -1194.584140
  B     -0.319817     0.371396     0.038395
Al     -1.491845     1.052939     1.547079
Al     -0.997575    -1.462024     0.862623
Al     -0.293456    -3.864197    -0.088499

```

|    |          |           |           |
|----|----------|-----------|-----------|
| Mg | 0.662696 | -1.211542 | -1.248792 |
| Al | 0.582290 | 1.802185  | -1.081795 |

6  
scf done: -1194.583305

|    |           |           |           |
|----|-----------|-----------|-----------|
| B  | 0.873185  | -0.204738 | 0.514190  |
| Mg | -0.182430 | 0.313530  | 2.608268  |
| Al | 2.669812  | -0.182418 | 1.465006  |
| Al | 1.797886  | 2.245747  | 2.430912  |
| Al | 0.629993  | 1.745312  | -0.010503 |
| Al | 1.115522  | -1.316305 | -1.153434 |

6  
scf done: -1194.582930

|    |           |           |           |
|----|-----------|-----------|-----------|
| Al | -1.270090 | -2.006794 | 0.277596  |
| B  | -0.295696 | -0.251244 | 0.235671  |
| Al | 1.478568  | 0.058761  | 1.195716  |
| Al | -1.216415 | 1.537600  | 0.579293  |
| Mg | 0.614260  | 0.587324  | -1.714338 |
| Al | 1.290793  | 2.587153  | 0.112071  |

6  
scf done: -1194.581382

|    |           |           |           |
|----|-----------|-----------|-----------|
| B  | 0.000000  | -0.259756 | -0.089583 |
| Al | 0.000000  | 0.798796  | 1.744637  |
| Mg | 0.000000  | 1.927388  | -0.525754 |
| Al | -0.000000 | -1.938575 | -1.401885 |
| Al | 2.146505  | -0.259549 | -0.089396 |
| Al | -2.146505 | -0.259549 | -0.089396 |

6  
scf done: -1194.581132

|    |           |           |           |
|----|-----------|-----------|-----------|
| B  | -0.687703 | -0.000000 | -0.029862 |
| Al | 0.348563  | -0.000000 | 1.678351  |
| Mg | 3.006656  | 0.000000  | 0.945716  |
| Al | 3.456853  | 0.000000  | -1.974916 |
| Al | 0.958738  | -0.000000 | -1.133242 |
| Al | -2.471059 | -0.000000 | -1.053208 |

6  
scf done: -1194.577292

|    |           |           |           |
|----|-----------|-----------|-----------|
| Al | 1.439709  | 1.522402  | 1.905636  |
| Al | -0.491400 | -0.067737 | 1.095747  |
| B  | 1.248092  | 0.560401  | 0.159184  |
| Al | 1.109868  | -0.384922 | -1.621236 |
| Mg | -1.292333 | -1.573370 | -0.992923 |
| Al | -0.646446 | 1.059385  | 3.630346  |

6  
scf done: -1194.574742

|    |           |           |           |
|----|-----------|-----------|-----------|
| B  | 0.000000  | 0.000000  | -0.911315 |
| Mg | 0.000000  | 0.000000  | 1.634421  |
| Al | 0.000000  | 2.009573  | -0.289532 |
| Al | -0.000000 | -2.009573 | -0.289532 |
| Al | 2.009548  | -0.000000 | -0.289563 |

|    |           |          |           |
|----|-----------|----------|-----------|
| Al | -2.009548 | 0.000000 | -0.289563 |
|----|-----------|----------|-----------|

6

scf done: -1194.565187

|    |           |           |           |
|----|-----------|-----------|-----------|
| B  | 0.165800  | 0.436137  | 0.764788  |
| Al | 0.992048  | -1.416276 | 1.068346  |
| Al | 0.662444  | 0.958272  | 2.684914  |
| Al | 3.275023  | -0.197385 | 2.326507  |
| Al | 1.985851  | 1.126950  | 0.120262  |
| Mg | -1.906674 | 0.863904  | -0.265072 |

6

scf done: -1194.563656

|    |           |           |           |
|----|-----------|-----------|-----------|
| B  | -0.215797 | -0.038101 | -0.144456 |
| Mg | 0.024443  | 0.015981  | 2.141050  |
| Al | 2.795050  | 0.035245  | 1.455199  |
| Al | 2.045932  | 2.260507  | 2.684831  |
| Al | 0.939696  | 1.596314  | 0.125830  |
| Al | 1.314644  | -1.268818 | -0.408014 |

6

scf done: -1194.552462

|    |           |           |           |
|----|-----------|-----------|-----------|
| B  | -0.023990 | 0.000000  | 0.101141  |
| Mg | -0.343683 | -0.000000 | 2.556456  |
| Al | 1.765767  | -0.000000 | -0.637531 |
| Al | -0.807025 | -1.708248 | -0.774931 |
| Al | -0.807025 | 1.708248  | -0.774931 |
| Al | 4.195029  | -0.000000 | -1.747146 |

6

scf done: -1194.552355

|    |           |           |           |
|----|-----------|-----------|-----------|
| Al | -1.154318 | -0.000000 | 1.000000  |
| Mg | 1.525128  | -0.000000 | 1.000000  |
| B  | -3.094051 | 0.000000  | 1.000000  |
| Al | -2.979595 | -0.000000 | 3.124204  |
| Al | -2.979595 | 0.000000  | -1.124204 |
| Al | -5.112966 | 0.000000  | 1.000000  |

7

scf done: -1194.549954

|    |           |           |           |
|----|-----------|-----------|-----------|
| Al | -0.000000 | -0.000000 | 1.639187  |
| Al | -0.000000 | -0.000000 | 4.326761  |
| B  | 0.000000  | 0.000000  | -0.272705 |
| Al | 0.000000  | 1.823779  | -1.198481 |
| Al | -0.000000 | -1.823779 | -1.198481 |
| Mg | 0.000000  | 0.000000  | -3.652475 |
| XX | -0.000000 | -1.000000 | 1.639187  |

6

scf done: -1194.543038

|    |          |           |           |
|----|----------|-----------|-----------|
| B  | 1.404944 | -0.257272 | -0.170268 |
| Mg | 0.968631 | -0.443030 | 2.015332  |
| Al | 1.044202 | -0.237619 | -2.215226 |
| Al | 3.140110 | 0.386348  | 0.561053  |
| Al | 3.424536 | 0.569457  | 3.073214  |

|    |          |           |          |
|----|----------|-----------|----------|
| Al | 1.630800 | -0.017884 | 4.866853 |
|----|----------|-----------|----------|

6

scf done: -1194.540507

|    |           |           |          |
|----|-----------|-----------|----------|
| B  | 0.043654  | 0.430142  | 2.701508 |
| Mg | -1.565583 | -0.324278 | 1.420724 |
| Al | 1.274727  | 0.102707  | 4.256258 |
| Al | 2.139820  | -0.316305 | 6.745750 |
| Al | -0.383111 | -0.533917 | 6.287733 |
| Al | -1.336518 | -0.804619 | 3.983583 |

6

scf done: -1194.535115

|    |           |           |           |
|----|-----------|-----------|-----------|
| Al | 0.715722  | -2.981951 | 0.310623  |
| Mg | 1.863798  | -0.661818 | -0.820329 |
| Al | -0.850759 | 0.739549  | -0.193234 |
| B  | -0.064075 | -1.108181 | 0.054700  |
| Al | -1.211073 | 3.220886  | 0.552667  |
| Al | -2.048221 | 2.572336  | -1.625087 |

7

scf done: -1194.531905

|    |           |           |           |
|----|-----------|-----------|-----------|
| Mg | 0.193366  | -0.000000 | 1.000000  |
| Al | 3.170660  | -0.000000 | 1.000000  |
| Al | -2.532066 | 0.000000  | 1.000000  |
| Al | -5.089884 | 0.000000  | 2.929843  |
| Al | -5.089884 | -0.000000 | -0.929843 |
| B  | -4.448623 | 0.000000  | 1.000000  |
| XX | -2.532066 | 0.000000  | 0.000000  |

6

scf done: -1194.513305

|    |           |           |           |
|----|-----------|-----------|-----------|
| B  | -0.472023 | -0.000000 | 0.219146  |
| Mg | 0.820063  | -0.000000 | 1.883403  |
| Al | 1.125751  | -0.000000 | -1.029539 |
| Al | -1.726045 | 0.000000  | -1.369271 |
| Al | -2.585367 | 0.000000  | -3.768625 |
| Al | -0.168710 | -0.000000 | -3.437403 |

6

scf done: -1194.507780

|    |           |           |           |
|----|-----------|-----------|-----------|
| Al | 1.101298  | -1.720414 | 0.836205  |
| Mg | -0.210842 | 1.337383  | 0.110281  |
| B  | -0.559856 | -0.681356 | 1.210585  |
| Al | -1.304918 | -1.871392 | -0.206722 |
| Al | 0.543652  | 3.152252  | -1.882426 |
| Al | -0.401922 | 4.132577  | 0.104864  |

6

scf done: -1194.506569

|    |          |           |           |
|----|----------|-----------|-----------|
| B  | 1.054112 | -0.000000 | 0.041617  |
| Al | 0.408493 | 0.000000  | 1.903685  |
| Al | 1.030100 | -0.000000 | -2.007700 |
| Mg | 3.052615 | -0.000000 | 0.866484  |
| Al | 4.206102 | 0.000000  | 3.349947  |

|    |          |          |          |
|----|----------|----------|----------|
| Al | 1.861800 | 0.000000 | 3.976924 |
|----|----------|----------|----------|

6

scf done: -1194.502177

|    |           |           |           |
|----|-----------|-----------|-----------|
| B  | -0.123694 | 0.224903  | 1.134985  |
| Al | 1.870747  | 0.783598  | 0.810970  |
| Al | -2.056184 | -0.264014 | 1.478288  |
| Al | -4.371508 | -1.003158 | 2.096422  |
| Al | -4.604099 | -1.165288 | -0.510687 |
| Mg | -4.511030 | 1.423962  | 0.990021  |

7

scf done: -1194.488185

|    |           |           |           |
|----|-----------|-----------|-----------|
| Mg | -0.961301 | -0.000000 | 1.000000  |
| Al | 1.750873  | -0.000000 | 1.000000  |
| B  | -3.100740 | 0.000000  | 1.000000  |
| Al | -3.207543 | 0.000000  | 3.137454  |
| Al | -3.207543 | -0.000000 | -1.137454 |
| Al | -5.069513 | 0.000000  | 1.000000  |
| XX | -0.961301 | -0.000000 | 0.000000  |

7

scf done: -1194.486365

|    |           |           |           |
|----|-----------|-----------|-----------|
| Al | -0.057409 | -0.000000 | 1.000000  |
| Mg | 2.534062  | -0.000000 | 1.000000  |
| Al | -2.538846 | 0.000000  | 1.000000  |
| Al | -4.628705 | 0.000000  | 3.074473  |
| Al | -4.628705 | -0.000000 | -1.074473 |
| B  | -4.476163 | 0.000000  | 1.000000  |
| XX | -0.057409 | -0.000000 | -0.000000 |

6

scf done: -1194.475625

|    |           |           |           |
|----|-----------|-----------|-----------|
| B  | 0.551581  | -0.000000 | 1.000000  |
| Al | -0.918506 | -0.000000 | 2.309599  |
| Al | -0.918506 | 0.000000  | -0.309599 |
| Al | -3.515814 | -0.000000 | 2.196967  |
| Al | -3.515814 | 0.000000  | -0.196967 |
| Mg | -6.221953 | 0.000000  | 1.000000  |

7

scf done: -1194.435808

|    |           |           |           |
|----|-----------|-----------|-----------|
| Al | -0.018490 | -0.000000 | 1.000000  |
| B  | 2.208983  | -0.000000 | 1.000000  |
| Al | -2.390271 | -0.000000 | 1.000000  |
| Al | -3.869651 | 0.000000  | 3.097369  |
| Al | -3.869651 | -0.000000 | -1.097369 |
| Mg | -5.856689 | 0.000000  | 1.000000  |
| XX | -0.018490 | 0.000000  | 0.000000  |

7

scf done: -1194.433985

|    |           |          |          |
|----|-----------|----------|----------|
| B  | 0.208374  | 0.000000 | 1.000000 |
| Mg | 2.334417  | 0.000000 | 1.000000 |
| Al | -1.785858 | 0.000000 | 1.000000 |

|    |           |          |           |
|----|-----------|----------|-----------|
| Al | -4.033554 | 0.000000 | 2.231379  |
| Al | -4.033554 | 0.000000 | -0.231379 |
| Al | -6.485594 | 0.000000 | 1.000000  |
| XX | 0.208374  | 0.000000 | 2.000000  |

7

scf done: -1194.424551

|    |           |          |           |
|----|-----------|----------|-----------|
| Mg | 0.511574  | 0.000000 | 1.000000  |
| B  | 3.007899  | 0.000000 | 1.000000  |
| Al | -2.193291 | 0.000000 | 1.000000  |
| Al | -4.319778 | 0.000000 | 2.309585  |
| Al | -4.319778 | 0.000000 | -0.309585 |
| Al | -6.482393 | 0.000000 | 1.000000  |
| XX | 0.511574  | 0.000000 | 2.000000  |

7

scf done: -1194.396180

|    |           |           |           |
|----|-----------|-----------|-----------|
| B  | -0.000000 | -0.000000 | 3.068342  |
| Al | -0.000000 | -0.000000 | 4.981545  |
| Mg | -0.000000 | -0.000000 | 0.988749  |
| Al | 0.000000  | 1.177586  | -1.637622 |
| Al | -0.000000 | -1.177586 | -1.637622 |
| Al | 0.000000  | 0.000000  | -4.034358 |
| XX | 1.000000  | 0.000000  | 3.068342  |

6

scf done: -1194.367619

|    |           |           |           |
|----|-----------|-----------|-----------|
| Al | -0.000000 | 0.012556  | -3.566147 |
| B  | -0.000000 | 0.016540  | -5.461707 |
| Mg | -0.000000 | 0.007034  | -1.033382 |
| Al | 0.000000  | 1.179239  | 1.575747  |
| Al | 0.000000  | -1.175882 | 1.571017  |
| Al | 0.000000  | -0.002973 | 3.986217  |

Optimized geometries of  $\text{BAI4Mg}^-$  (triplet) obtained at the UwB97XD/6-311++G(2d,2p) level

6

scf done: -1194.609058

|    |           |           |          |
|----|-----------|-----------|----------|
| B  | 0.612326  | 0.575158  | 2.109187 |
| Al | 1.936668  | 0.106942  | 0.604075 |
| Al | 1.264623  | 2.328898  | 2.967607 |
| Mg | -2.674912 | -1.552763 | 3.176873 |
| Al | -0.909106 | 0.698286  | 3.497371 |
| Al | -0.349440 | -1.154675 | 1.526427 |

6

scf done: -1194.604860

|    |           |           |           |
|----|-----------|-----------|-----------|
| B  | -0.000000 | 0.004346  | -0.016064 |
| Al | -0.000000 | 0.714452  | 1.946423  |
| Mg | -0.000000 | 2.073228  | -0.812898 |
| Al | 0.000000  | -1.751092 | -1.397487 |
| Al | 2.047400  | -0.516101 | -0.085739 |
| Al | -2.047400 | -0.516101 | -0.085739 |



```

6
scf done: -1194.604862
  B      1.149828      0.407128      0.921874
Mg     -0.540576     -0.433907      2.082650
Al      2.855721     -0.492150      1.800730
Al      2.294974      2.168784      1.679912
Al      0.217353      2.009738     -0.084111
Al      0.926669     -1.058466     -0.546616

```

```

6
scf done: -1194.588831
Al     -1.067838     -0.000000      1.000000
Mg      1.731143     -0.000000      1.000000
  B     -3.001254      0.000000      1.000000
Al     -3.158704      0.000000      3.071871
Al     -3.158704      0.000000     -1.071871
Al     -5.140410      0.000000      1.000000

```

```

6
scf done: -1194.578916
  B     -0.528274      0.108006     -0.082350
Al     -1.394856      1.228219      1.455898
Al     -1.003051     -1.475581      1.105618
Al     -0.312245     -3.610725     -0.297191
Mg      0.866784     -1.237111     -1.217895
Al      0.513935      1.675949     -0.935068

```

```

6
scf done: -1194.578797
  B     -0.093124     -0.000000      1.000000
Mg      2.280594     -0.000000      1.000000
Al      0.546320      0.000000      3.055576
Al      0.546320     -0.000000     -1.055576
Al     -1.790054      0.000000      2.322613
Al     -1.790054     -0.000000     -0.322613

```

```

6
scf done: -1194.573345
  B      0.000000     -0.000000     -0.679801
Mg     -0.000000      0.000000      2.994911
Al     -0.000000      1.470129      0.773524
Al     -0.000000     -1.470129      0.773524
Al      0.000000      1.571164     -1.996674
Al      0.000000     -1.571164     -1.996674

```

```

6
scf done: -1194.567461
  B      0.072967      0.000000      0.058523
Al     -0.018515     -0.000000      2.204153
Al      2.399458     -0.000000      3.073098
Al      2.059952     -0.000000      0.484130
Al      0.538619      0.000000     -1.940029
Mg     -2.053420      0.000000      0.483112

```

Optimized geometries of BAl4Mg (doublet) obtained at the UwB97XD/6-311++G(2d,2p) level

6

1n scf done: -1194.533697  
 B -0.059261 -0.000000 1.000000  
 Mg 3.462181 -0.000000 1.000000  
 Al 1.238856 -0.000000 2.580014  
 Al 1.238856 -0.000000 -0.580014  
 Al -1.441392 0.000000 2.581367  
 Al -1.441392 0.000000 -0.581367

6

2n scf done: -1194.525739  
 Al 0.775233 1.069224 1.798800  
 Al -1.789846 0.286022 -0.227325  
 B 0.301660 0.568934 -0.139295  
 Al 1.170937 -0.827597 -1.373933  
 Al 2.474177 -0.702467 0.891809  
 Mg 0.398699 2.499303 -1.288036

6

3n scf done: -1194.524604  
 B -0.121493 -0.000000 0.951941  
 Mg 3.656418 0.000000 1.016646  
 Al 1.314459 0.000000 -0.489289  
 Al 1.264261 0.000000 2.441504  
 Al -1.354461 -1.698472 0.930603  
 Al -1.354461 1.698472 0.930603

6

4n scf done: -1194.518675  
 Al -0.416125 -1.447220 -0.393157  
 Al -0.682499 1.315321 -0.904537  
 B 0.557291 -0.140663 -1.591647  
 Al 2.140213 0.489540 -0.505785  
 Al -1.380106 0.328436 1.343485  
 Mg 1.054736 1.443067 1.897012

6

5n scf done: -1194.512600  
 B -0.151075 0.007393 0.434333  
 Al -0.180587 -0.008174 2.553123  
 Mg 1.924995 0.000406 -0.330784  
 Al -2.163028 0.005017 0.471935  
 Al -2.987025 -0.004150 -2.056940  
 Al -0.372046 -0.000492 -1.649739

7

6n scf done: -1194.510608  
 Al -0.880254 -0.000000 1.000000  
 Mg 1.965586 -0.000000 1.000000  
 B -2.804155 0.000000 1.000000  
 Al -3.427905 -0.000000 2.946949  
 Al -3.427905 0.000000 -0.946949  
 Al -5.221135 0.000000 1.000000  
 XX -0.880254 0.000000 0.000000

6

7n scf done: -1194.508973  
 B -0.190467 0.435400 0.020808  
 Al -1.198642 2.132574 0.306156  
 Mg 0.949781 -0.022537 -1.768345  
 Al -1.003049 0.094263 1.965729  
 Al 0.496787 -1.475857 0.582033  
 Al -0.343201 -2.376453 3.143269

6

8n scf done: -1194.506358  
 Al -0.973395 -1.609257 0.839785  
 Mg 1.690905 -1.366461 -0.319472  
 Al 1.328653 1.481706 -0.554392  
 B 0.016990 0.062466 0.195169  
 Al -1.732846 0.930725 0.815718  
 Al 0.448862 -3.800890 0.534845

6

9n scf done: -1194.499527  
 B 0.000000 0.000000 -0.779575  
 Mg 0.000000 0.000000 1.657830  
 Al 0.000000 2.090572 -0.307238  
 Al -0.000000 -2.090572 -0.307238

|    |           |           |           |
|----|-----------|-----------|-----------|
| Al | 2.091073  | -0.000000 | -0.307996 |
| Al | -2.091073 | 0.000000  | -0.307996 |

6

10n scf done: -1194.499569

|    |           |           |           |
|----|-----------|-----------|-----------|
| B  | 1.635223  | -0.303857 | -0.000000 |
| Al | 0.769989  | -2.128599 | -0.000000 |
| Mg | -1.932048 | -1.395941 | 0.000000  |
| Al | -2.577224 | 1.512913  | 0.000000  |
| Al | 0.000000  | 0.846983  | -0.000000 |
| Al | 2.961732  | 1.174132  | -0.000000 |

6

11n scf done: -1194.500450

|    |           |           |           |
|----|-----------|-----------|-----------|
| Al | 1.500794  | 1.585011  | 1.956798  |
| Al | -0.531388 | -0.110035 | 1.059534  |
| B  | 1.225371  | 0.598490  | 0.267303  |
| Al | 1.042809  | -0.365911 | -1.495598 |
| Mg | -1.317313 | -1.600542 | -1.017045 |
| Al | -0.552784 | 1.009147  | 3.405760  |

6

12n scf done: -1194.499025

|    |           |           |           |
|----|-----------|-----------|-----------|
| B  | -0.165549 | 0.003279  | -0.099345 |
| Mg | -0.087419 | 0.048802  | 2.132114  |
| Al | 2.914317  | 0.081034  | 1.333393  |
| Al | 1.966853  | 2.099621  | 2.622567  |
| Al | 0.949351  | 1.664760  | 0.142870  |
| Al | 1.326414  | -1.296369 | -0.277159 |

6

13n scf done: -1194.479049

|    |           |           |           |
|----|-----------|-----------|-----------|
| Al | 1.420926  | 2.090205  | -0.000000 |
| Al | -1.644365 | 1.811423  | -0.000000 |
| B  | 0.000000  | 0.627761  | -0.000000 |
| Mg | 1.840015  | -0.700873 | 0.000000  |
| Al | -1.536305 | -0.788410 | 0.000000  |
| Al | 0.061269  | -2.707704 | 0.000000  |

6

14n scf done: -1194.478458

|    |           |           |           |
|----|-----------|-----------|-----------|
| Al | 0.000000  | -0.000000 | 1.810889  |
| Al | 0.000000  | -0.000000 | 4.596579  |
| B  | -0.000000 | 0.000000  | -0.106097 |
| Al | -0.000000 | 1.491955  | -1.437911 |
| Al | -0.000000 | -1.491955 | -1.437911 |
| Mg | -0.000000 | 0.000000  | -3.781742 |

6

15n scf done: -1194.475601

|    |           |           |           |
|----|-----------|-----------|-----------|
| B  | -0.133208 | 0.334063  | 0.214837  |
| Al | 0.487741  | -0.873067 | 1.677159  |
| Al | 1.822125  | 0.869690  | 3.486629  |
| Al | 3.293077  | -0.417132 | 1.806027  |
| Al | 1.435536  | 1.453694  | 0.731417  |
| Mg | -1.730778 | 0.404352  | -1.216324 |

6

16n scf done: -1194.474682

|    |           |           |           |
|----|-----------|-----------|-----------|
| Al | 0.000000  | 0.000000  | 4.061598  |
| Mg | 0.000000  | 0.000000  | 1.010483  |
| B  | 0.000000  | 0.000000  | -1.109900 |
| Al | -0.000000 | 2.062961  | -1.522489 |
| Al | 1.786577  | -1.031481 | -1.522489 |
| Al | -1.786577 | -1.031481 | -1.522489 |

7

17n scf done: -1194.471437

|    |           |           |           |
|----|-----------|-----------|-----------|
| Mg | -0.853059 | -0.000000 | 1.000000  |
| Al | 2.101023  | -0.000000 | 1.000000  |
| B  | -3.066379 | 0.000000  | 1.000000  |
| Al | -3.417876 | 0.000000  | 3.043171  |
| Al | -3.417876 | -0.000000 | -1.043171 |
| Al | -5.141601 | 0.000000  | 1.000000  |
| XX | -0.853059 | -0.000000 | 2.000000  |

6

18n scf done: -1194.472382

|    |          |           |          |
|----|----------|-----------|----------|
| B  | 0.054905 | -0.000000 | 0.049480 |
| Mg | 0.017976 | -0.000000 | 2.216744 |

|    |           |           |           |
|----|-----------|-----------|-----------|
| Al | 1.265963  | -0.000000 | -1.542378 |
| Al | -1.491855 | 0.000000  | -1.180967 |
| Al | -2.658169 | 0.000000  | -3.442710 |
| Al | -0.195150 | 0.000000  | -3.602458 |

6

19n scf done: -1194.459391

|    |           |           |          |
|----|-----------|-----------|----------|
| B  | -0.224887 | -0.096815 | 2.297360 |
| Mg | -2.192548 | -0.382095 | 1.378733 |
| Al | 1.455506  | 0.119027  | 3.360545 |
| Al | 1.470141  | -0.384989 | 8.448994 |
| Al | 0.786214  | -0.250999 | 5.788337 |
| Al | -1.121436 | -0.450398 | 4.121585 |

6

20n scf done: -1194.453596

|    |           |           |           |
|----|-----------|-----------|-----------|
| Al | 0.549547  | -3.093145 | 0.408516  |
| Mg | 1.890957  | -0.529142 | -0.870578 |
| Al | -0.713039 | 0.697113  | -0.233856 |
| B  | 0.040530  | -1.106734 | 0.013347  |
| Al | -1.247522 | 3.242247  | 0.610011  |
| Al | -2.115082 | 2.570482  | -1.648100 |

6

21n scf done: -1194.453513

|    |           |           |           |
|----|-----------|-----------|-----------|
| B  | 0.243940  | -0.000000 | 1.000000  |
| Mg | 2.402685  | -0.000000 | 1.000000  |
| Al | -1.251011 | -0.000000 | 2.307326  |
| Al | -1.251011 | -0.000000 | -0.307326 |
| Al | -3.695514 | 0.000000  | 2.205331  |
| Al | -3.695514 | 0.000000  | -0.205331 |

6

22n scf done: -1194.448713

|    |           |           |           |
|----|-----------|-----------|-----------|
| B  | -0.130095 | 0.212082  | 1.009934  |
| Al | 1.947501  | 0.711610  | 0.983379  |
| Al | -2.064438 | -0.240208 | 1.048685  |
| Al | -4.415515 | -1.039513 | 2.262066  |
| Al | -4.409691 | -1.058241 | -0.303921 |
| Mg | -4.723530 | 1.414271  | 0.999856  |

6

23n scf done: -1194.448886

|    |           |           |           |
|----|-----------|-----------|-----------|
| Al | 1.109231  | -1.660091 | 0.801185  |
| Mg | -0.204478 | 1.220039  | 0.128991  |
| B  | -0.581063 | -0.730290 | 1.286440  |
| Al | -1.308786 | -1.801622 | -0.224208 |
| Al | 0.573467  | 3.174538  | -1.915134 |
| Al | -0.420960 | 4.146476  | 0.095513  |

7

24n scf done: -1194.448619

|    |           |           |           |
|----|-----------|-----------|-----------|
| Mg | 0.258483  | -0.000000 | 1.000000  |
| Al | 3.236629  | -0.000000 | 1.000000  |
| Al | -2.514868 | 0.000000  | 1.000000  |
| Al | -5.183603 | 0.000000  | 2.888896  |
| Al | -5.183603 | -0.000000 | -0.888896 |
| B  | -4.409468 | 0.000000  | 1.000000  |
| XX | -2.514868 | 0.000000  | -0.000000 |

6

25n scf done: -1194.430541

|    |           |           |           |
|----|-----------|-----------|-----------|
| B  | 0.494980  | -0.000000 | 1.000000  |
| Al | -0.956586 | -0.000000 | 2.385154  |
| Al | -0.956586 | 0.000000  | -0.385154 |
| Al | -3.433493 | -0.000000 | 2.299549  |
| Al | -3.433493 | 0.000000  | -0.299549 |
| Mg | -6.253835 | 0.000000  | 1.000000  |

8

26n scf done: -1194.421191

|    |           |           |           |
|----|-----------|-----------|-----------|
| Al | 0.148020  | -0.000000 | 1.000000  |
| Mg | 2.676507  | -0.000000 | 1.000000  |
| Al | -2.276448 | -0.000000 | 1.000000  |
| Al | -5.055315 | 0.000000  | 2.952999  |
| Al | -5.055315 | -0.000000 | -0.952999 |
| B  | -4.233216 | 0.000000  | 1.000000  |
| XX | -2.276448 | -0.000000 | 0.000000  |
| XX | 0.148020  | 0.000000  | 0.000000  |

7

27n scf done: -1194.397056

|    |           |           |           |
|----|-----------|-----------|-----------|
| B  | 0.208374  | -0.000000 | 1.000000  |
| Mg | 2.334417  | -0.000000 | 1.000000  |
| Al | -1.785858 | -0.000000 | 1.000000  |
| Al | -4.033554 | 0.000000  | 2.231379  |
| Al | -4.033554 | 0.000000  | -0.231379 |
| Al | -6.485594 | 0.000000  | 1.000000  |
| XX | 0.208374  | -0.000000 | 2.000000  |

6

28n scf done: -1194.371320

|    |          |           |           |
|----|----------|-----------|-----------|
| Al | 0.000000 | 0.017916  | -3.552287 |
| B  | 0.000000 | 0.061158  | -5.513258 |
| Mg | 0.000000 | -0.069080 | -0.873666 |
| Al | 0.000000 | 1.288236  | 1.540615  |
| Al | 0.000000 | -1.238056 | 1.667965  |
| Al | 0.000000 | -0.023661 | 3.802377  |

6

29n scf done: -1194.366392

|    |           |           |           |
|----|-----------|-----------|-----------|
| Mg | -0.000000 | -0.000000 | 2.495378  |
| B  | -0.000000 | -0.000000 | 4.961763  |
| Al | 0.000000  | 1.333839  | 0.181849  |
| Al | -0.000000 | -1.333839 | 0.181849  |
| Al | 0.000000  | 1.273372  | -2.287747 |
| Al | -0.000000 | -1.273372 | -2.287747 |

7

30n scf done: -1194.357775

|    |           |           |           |
|----|-----------|-----------|-----------|
| Mg | 0.511574  | 0.000000  | 1.000000  |
| B  | 3.007899  | 0.000000  | 1.000000  |
| Al | -2.193291 | 0.000000  | 1.000000  |
| Al | -4.319778 | -0.000000 | 2.309585  |
| Al | -4.319778 | 0.000000  | -0.309585 |
| Al | -6.482393 | 0.000000  | 1.000000  |
| XX | 0.511574  | 0.000000  | 2.000000  |

7



```

31n  scf done: -1194.342533
  B   -0.000000  -0.000000   3.123545
 Al  -0.000000  -0.000000   5.046300
Mg   -0.000000  -0.000000   0.971685
 Al   0.000000   1.177172  -1.640350
 Al  -0.000000  -1.177172  -1.640350
 Al   0.000000  -0.000000  -4.131795
XX   1.000000   0.000000   3.123545

```

7

```

32n  scf done: -1194.352810
 Al   0.376393  -0.000000   1.000000
  B   2.339761  -0.000000   1.000000
 Al  -2.107511  -0.000000   1.000000
 Al  -4.065542   0.000000   2.500489
 Al  -4.065542  -0.000000  -0.500489
Mg  -6.273326   0.000000   1.000000
XX   0.376393  -0.000000   2.000000

```

Optimized geometries of BA14Mg (quartet) obtained at the UwB97XD/6-311++G(2d,2p) level

```

6
scf done: -1194.518613
  B   0.836003   0.000026   0.438452
Mg  -3.289232  -0.002000  -0.130151
 Al  -0.689426  -1.385420   0.032123
 Al  -0.691277   1.384493   0.036329
 Al   2.053396  -1.501239  -0.176778
 Al   2.051137   1.504768  -0.172740

```

```

6
scf done: -1194.517234
 Al   0.484976   1.220182   1.901332
 Al  -1.498562   0.219718  -0.361857
  B   0.542846   0.513077  -0.058044
 Al   0.804791  -1.247908  -1.344845
 Al   2.442629  -0.423101   0.523304
Mg   0.554180   2.611450  -0.997869

```

```

6
scf done: -1194.477098
 Al  -0.841714   1.203961   0.000471
 Al  -3.028299  -0.005736  -0.001100
Mg  -0.743829  -1.583615   0.001291
  B   0.936482  -0.020731   0.002332
 Al   1.922134   1.733731   0.002721

```

|    |          |           |          |
|----|----------|-----------|----------|
| Al | 2.275632 | -1.462428 | 0.003870 |
|----|----------|-----------|----------|

6

scf done: -1194.491714

|    |           |           |           |
|----|-----------|-----------|-----------|
| Al | -0.736832 | -1.447013 | -0.604885 |
| Al | -0.569587 | 1.483900  | -1.103606 |
| B  | 0.536403  | -0.169038 | -1.556964 |
| Al | 1.966497  | 0.344963  | -0.217182 |
| Al | -0.884173 | -0.085142 | 1.509753  |
| Mg | 0.961201  | 1.860811  | 1.818254  |

6

scf done: -1194.492050

|    |           |           |           |
|----|-----------|-----------|-----------|
| Al | -1.078018 | -0.000000 | 1.000000  |
| Mg | 1.677238  | -0.000000 | 1.000000  |
| B  | -3.004361 | 0.000000  | 1.000000  |
| Al | -3.196865 | 0.000000  | 3.071735  |
| Al | -3.196865 | 0.000000  | -1.071735 |
| Al | -4.996897 | 0.000000  | 1.000000  |

6

scf done: -1194.487550

|    |           |           |           |
|----|-----------|-----------|-----------|
| B  | 0.471152  | -0.000000 | 1.000000  |
| Mg | 2.816057  | -0.000000 | 1.000000  |
| Al | 1.109268  | 0.000000  | 3.074519  |
| Al | 1.109268  | -0.000000 | -1.074519 |
| Al | -1.253949 | 0.000000  | 2.286315  |
| Al | -1.253949 | -0.000000 | -0.286315 |

6

scf done: -1194.485152

|    |           |           |           |
|----|-----------|-----------|-----------|
| B  | -0.133447 | 0.000000  | -0.025460 |
| Al | 0.089974  | -0.000000 | 2.079449  |
| Al | 2.563801  | -0.000000 | 2.686107  |
| Al | 1.978777  | -0.000000 | 0.176204  |
| Al | 0.393909  | 0.000000  | -1.936418 |
| Mg | -2.223424 | 0.000000  | 0.505311  |

Optimized geometries of  $\text{BAI}_4\text{Mg}^+$  (singlet) obtained at the wb97XD/6-311++G(2d,2p) level

6

1c scf done: -1194.310565

|    |           |           |           |
|----|-----------|-----------|-----------|
| B  | -0.244364 | 0.000000  | 1.000000  |
| Mg | 3.540667  | -0.000000 | 1.000000  |
| Al | 1.218688  | 0.000000  | 2.485248  |
| Al | 1.218688  | -0.000000 | -0.485248 |
| Al | -1.367916 | 0.000000  | 2.746933  |
| Al | -1.367916 | -0.000000 | -0.746933 |

6

2c scf done: -1194.306672

|    |           |           |           |
|----|-----------|-----------|-----------|
| B  | 0.199978  | -0.137949 | 0.226507  |
| Al | -0.390570 | 0.023455  | 2.242489  |
| Al | 2.200657  | 0.168746  | -0.358732 |
| Al | -0.848058 | -1.712351 | -0.908100 |
| Mg | -0.591167 | 1.696447  | -0.456129 |
| Al | 2.265373  | 0.512711  | 2.320355  |

6

3c scf done: -1194.304129

|    |           |           |           |
|----|-----------|-----------|-----------|
| B  | 0.013577  | -0.000000 | 1.000000  |
| Mg | 2.328626  | -0.000000 | 1.000000  |
| Al | 0.502784  | 0.000000  | 3.069258  |
| Al | 0.502784  | -0.000000 | -1.069258 |
| Al | -1.823885 | 0.000000  | 2.267144  |
| Al | -1.823885 | -0.000000 | -0.267144 |

6

4c scf done: -1194.297679

|    |           |           |           |
|----|-----------|-----------|-----------|
| B  | 0.005541  | 0.013045  | -0.104760 |
| Al | 2.135377  | 0.306543  | -0.468740 |
| Mg | -0.047112 | -1.689123 | 1.143606  |
| Al | -1.281996 | -0.541145 | -1.775217 |
| Al | -0.808012 | 1.312898  | 1.180490  |
| Al | -1.949748 | 3.506932  | 2.744310  |

6

5c scf done: -1194.292206

|    |           |           |           |
|----|-----------|-----------|-----------|
| B  | -0.152171 | 0.000000  | 0.951311  |
| Mg | 3.731117  | -0.000000 | 1.017982  |
| Al | 1.409264  | -0.000000 | -0.339435 |
| Al | 1.364036  | -0.000000 | 2.294894  |
| Al | -1.473762 | -1.711642 | 0.928628  |
| Al | -1.473762 | 1.711642  | 0.928628  |

6

6c scf done: -1194.292247

|    |          |          |           |
|----|----------|----------|-----------|
| Al | 0.000000 | 0.000000 | 0.000000  |
| Mg | 0.000000 | 0.000000 | 2.769192  |
| Al | 2.402650 | 0.000000 | 1.536359  |
| B  | 2.052929 | 0.000000 | -0.420628 |
| Al | 0.839277 | 0.000000 | -2.302549 |
| Al | 3.287909 | 0.000000 | -1.995515 |

6

7c scf done: -1194.287565  
B 0.000000 0.000000 -0.000000  
Al 0.000000 0.000000 2.038923  
Al 2.531152 -0.000000 3.666203  
Al 2.216566 -0.000000 0.697047  
Al 1.229152 -0.000000 -1.612660  
Mg -2.021036 0.000000 -0.519600

6

8c scf done: -1194.287698  
B -0.118278 0.006877 0.018199  
Mg -0.430845 0.150545 2.168227  
Al 3.173310 0.136296 1.152256  
Al 1.905027 1.869642 2.533495  
Al 0.956585 1.704274 0.157567  
Al 1.418168 -1.266507 -0.175304

6

9c scf done: -1194.287464  
Al -0.386244 -1.327075 -0.335821  
Al -0.898642 1.130951 -1.179580  
B 0.616749 -0.140709 -1.646784  
Al 2.013354 0.566259 -0.434483  
Al -1.274583 0.476905 1.302344  
Mg 1.202876 1.282152 2.139696

6

10c scf done: -1194.284990  
Al -1.301025 0.351854 -1.838324  
B -0.211195 0.131125 0.020415  
Mg 0.586852 -1.882867 0.088708  
Al 1.433431 1.510275 0.312084  
Al -1.373471 -0.121445 1.634531  
Al -1.067880 -2.538922 2.544554

6

11c scf done: -1194.283539  
Al 1.873762 0.780400 0.911126  
Al -0.909630 -1.150507 1.726601  
B -0.056316 0.296888 0.113167  
Al -1.840122 1.057523 -0.800523  
Al 0.616110 -0.951461 -1.546479

Mg -0.222614 2.552688 0.837018

6

12c scf done: -1194.282921

|    |           |           |           |
|----|-----------|-----------|-----------|
| B  | -0.210463 | -0.108520 | 0.040930  |
| Al | 0.400833  | -0.792055 | 2.052682  |
| Al | -1.885755 | -1.248324 | -0.842320 |
| Al | 1.276158  | -0.554991 | -1.063012 |
| Al | -0.382966 | 2.085083  | -0.168144 |
| Mg | 3.460502  | -1.209803 | -2.686616 |

6

13c scf done: -1194.276928

|    |           |           |           |
|----|-----------|-----------|-----------|
| B  | -0.000000 | 0.000000  | -0.161268 |
| Mg | -0.000000 | 0.000000  | 1.957588  |
| Al | -0.000000 | 2.264685  | -0.554011 |
| Al | 0.000000  | -2.264685 | -0.554011 |
| Al | 2.275790  | 0.000000  | -0.520006 |
| Al | -2.275790 | -0.000000 | -0.520006 |

6

14c scf done: -1194.279083

|    |           |           |           |
|----|-----------|-----------|-----------|
| B  | -0.043288 | -0.000000 | 0.090391  |
| Mg | 0.217909  | -0.000000 | 2.208168  |
| Al | 1.283277  | -0.000000 | -1.418057 |
| Al | -1.537145 | 0.000000  | -1.208691 |
| Al | -2.823463 | 0.000000  | -3.628231 |
| Al | -0.103620 | 0.000000  | -3.545868 |

7

15c scf done: -1194.278130

|    |           |           |           |
|----|-----------|-----------|-----------|
| Al | -0.883985 | -0.000000 | 1.000000  |
| Mg | 1.892953  | -0.000000 | 1.000000  |
| B  | -2.780749 | 0.000000  | 1.000000  |
| Al | -3.415327 | 0.000000  | 2.987628  |
| Al | -3.415327 | 0.000000  | -0.987628 |
| Al | -5.193332 | 0.000000  | 1.000000  |
| XX | -0.883985 | 0.000000  | -0.000000 |

6

16c scf done: -1194.275849

|    |           |           |           |
|----|-----------|-----------|-----------|
| B  | 0.969630  | -0.202643 | 0.769762  |
| Al | 1.439701  | -1.616493 | -0.569203 |
| Mg | -0.339110 | -1.479236 | 1.841067  |

|    |           |           |           |
|----|-----------|-----------|-----------|
| Al | -0.527887 | 0.717567  | -0.191207 |
| Al | -2.207856 | 2.720004  | -1.424291 |
| Al | 2.887382  | -3.317309 | -2.403297 |

7

17c scf done: -1194.271999

|    |           |           |           |
|----|-----------|-----------|-----------|
| Al | -0.000000 | 0.000000  | 1.887911  |
| Al | -0.000000 | 0.000000  | 4.803045  |
| B  | -0.000000 | -0.000000 | -0.077664 |
| Al | 0.000000  | 1.326147  | -1.555581 |
| Al | -0.000000 | -1.326147 | -1.555581 |
| Mg | 0.000000  | -0.000000 | -3.858322 |
| XX | 0.000000  | 1.000000  | 1.887911  |

6

18c scf done: -1194.266665

|    |           |           |           |
|----|-----------|-----------|-----------|
| B  | -0.208663 | 0.338220  | 0.148958  |
| Al | 0.483780  | -0.801633 | 1.620107  |
| Al | 1.911947  | 0.873785  | 3.588461  |
| Al | 3.402757  | -0.429600 | 1.883787  |
| Al | 1.375482  | 1.384852  | 0.730470  |
| Mg | -1.790810 | 0.405976  | -1.272039 |

6

19c scf done: -1194.261598

|    |           |           |          |
|----|-----------|-----------|----------|
| B  | -0.740824 | -0.215405 | 2.509572 |
| Mg | -1.606222 | -0.189911 | 0.566413 |
| Al | 1.020587  | 0.063961  | 3.400270 |
| Al | 1.960572  | -0.307331 | 8.555629 |
| Al | 0.796523  | -0.264544 | 5.955431 |
| Al | -1.257646 | -0.533040 | 4.408239 |

6

20c scf done: -1194.258845

|    |           |           |           |
|----|-----------|-----------|-----------|
| B  | -0.000000 | -0.000000 | 1.687301  |
| Mg | -0.000000 | -0.000000 | 3.853690  |
| Al | -0.000000 | 1.294828  | 0.175702  |
| Al | -0.000000 | -1.294828 | 0.175702  |
| Al | 0.000000  | 1.266850  | -2.278809 |
| Al | -0.000000 | -1.266850 | -2.278809 |

6

21c scf done: -1194.253420

|    |           |           |           |
|----|-----------|-----------|-----------|
| B  | -1.138135 | 0.830372  | 1.730863  |
| Al | 0.412961  | 0.845553  | 0.470994  |
| Al | -1.726291 | -0.987715 | 1.073405  |
| Al | -4.213731 | -0.990853 | 2.355157  |
| Al | -4.227556 | -1.188848 | -0.151351 |
| Mg | -2.903015 | 1.491493  | 0.520930  |

7

22c scf done: -1194.225706

|    |           |           |           |
|----|-----------|-----------|-----------|
| Mg | -0.773500 | -0.000000 | 1.000000  |
| Al | 2.302743  | -0.000000 | 1.000000  |
| B  | -2.970485 | 0.000000  | 1.000000  |
| Al | -3.608698 | 0.000000  | 2.959760  |
| Al | -3.608698 | -0.000000 | -0.959760 |
| Al | -5.137131 | 0.000000  | 1.000000  |
| XX | -0.773500 | -0.000000 | 2.000000  |

7

23c scf done: -1194.222698

|    |           |           |           |
|----|-----------|-----------|-----------|
| Al | -0.000000 | -0.000000 | 4.237516  |
| Mg | -0.000000 | -0.000000 | 1.074310  |
| B  | -0.000000 | -0.000000 | -1.034132 |
| Al | 0.000000  | 2.111275  | -1.627647 |
| Al | 1.828418  | -1.055638 | -1.627647 |
| Al | -1.828418 | -1.055637 | -1.627647 |
| XX | -0.000000 | 1.000000  | 1.074310  |

6

24c scf done: -1194.220368

|    |           |           |           |
|----|-----------|-----------|-----------|
| Al | 1.092206  | -1.697819 | 0.883285  |
| Mg | -0.128353 | 1.032493  | -0.028848 |
| B  | -0.586337 | -0.694822 | 1.303120  |
| Al | -1.364001 | -1.839798 | -0.141565 |
| Al | 0.638604  | 3.380228  | -2.061200 |
| Al | -0.484708 | 4.168767  | 0.217996  |

7

25c scf done: -1194.206685

|    |          |           |          |
|----|----------|-----------|----------|
| Mg | 0.399081 | -0.000000 | 1.000000 |
| Al | 3.468982 | -0.000000 | 1.000000 |

|    |           |           |           |
|----|-----------|-----------|-----------|
| Al | -2.530585 | 0.000000  | 1.000000  |
| Al | -5.357331 | 0.000000  | 2.846705  |
| Al | -5.357331 | -0.000000 | -0.846705 |
| B  | -4.419246 | 0.000000  | 1.000000  |
| XX | -2.530585 | 0.000000  | 2.000000  |

7

26c scf done: -1194.197762

|    |           |           |           |
|----|-----------|-----------|-----------|
| Al | 0.334793  | -0.000000 | 1.000000  |
| Mg | 3.603555  | -0.000000 | 1.000000  |
| Al | -2.616115 | 0.000000  | 1.000000  |
| Al | -5.308572 | 0.000000  | 2.940958  |
| Al | -5.308572 | -0.000000 | -0.940958 |
| B  | -4.500857 | 0.000000  | 1.000000  |
| XX | -2.616115 | 0.000000  | 0.000000  |

6

27c scf done: -1194.196799

|    |           |           |           |
|----|-----------|-----------|-----------|
| B  | 0.501382  | -0.000000 | 1.000000  |
| Al | -0.813241 | -0.000000 | 2.470209  |
| Al | -0.813241 | 0.000000  | -0.470209 |
| Al | -3.232068 | -0.000000 | 2.240208  |
| Al | -3.232068 | 0.000000  | -0.240208 |
| Mg | -6.949778 | 0.000000  | 1.000000  |

7

28c scf done: -1194.177328

|    |           |           |           |
|----|-----------|-----------|-----------|
| B  | 0.235562  | -0.000000 | 1.000000  |
| Mg | 2.381322  | -0.000000 | 1.000000  |
| Al | -1.737638 | -0.000000 | 1.000000  |
| Al | -4.000164 | 0.000000  | 2.217388  |
| Al | -4.000164 | 0.000000  | -0.217388 |
| Al | -6.674686 | 0.000000  | 1.000000  |
| XX | 0.235562  | -0.000000 | 2.000000  |

6

29c scf done: -1194.141133

|    |           |          |          |
|----|-----------|----------|----------|
| Mg | -0.000000 | 0.000000 | 2.745252 |
| B  | -0.000000 | 0.000000 | 5.257579 |
| Al | -0.000000 | 1.287145 | 0.130458 |



|    |           |           |           |
|----|-----------|-----------|-----------|
| Al | -0.000000 | -1.287145 | 0.130458  |
| Al | 0.000000  | 1.249745  | -2.509201 |
| Al | 0.000000  | -1.249745 | -2.509201 |

7

30c scf done: -1194.133351

|    |           |           |           |
|----|-----------|-----------|-----------|
| Al | 0.297125  | -0.000000 | 1.000000  |
| B  | 2.702041  | -0.000000 | 1.000000  |
| Al | -2.146975 | -0.000000 | 1.000000  |
| Al | -4.140416 | 0.000000  | 2.403816  |
| Al | -4.140416 | -0.000000 | -0.403816 |
| Mg | -6.367126 | 0.000000  | 1.000000  |
| XX | 0.297125  | -0.000000 | 2.000000  |

7

31c scf done: -1194.131595

|    |           |           |           |
|----|-----------|-----------|-----------|
| Mg | 0.504145  | 0.000000  | 1.000000  |
| B  | 3.017439  | 0.000000  | 1.000000  |
| Al | -2.297783 | 0.000000  | 1.000000  |
| Al | -4.341679 | -0.000000 | 2.452998  |
| Al | -4.341679 | 0.000000  | -0.452998 |
| Al | -6.336210 | -0.000000 | 1.000000  |
| XX | 0.504145  | 0.000000  | 2.000000  |

7

32c scf done: -1194.114122

|    |           |           |           |
|----|-----------|-----------|-----------|
| B  | -0.000000 | 0.000000  | 3.185630  |
| Al | -0.000000 | 0.000000  | 5.234467  |
| Mg | -0.000000 | 0.000000  | 0.915889  |
| Al | 0.000000  | 1.204622  | -1.704680 |
| Al | -0.000000 | -1.204622 | -1.704680 |
| Al | 0.000000  | -0.000000 | -4.197592 |
| XX | 1.000000  | 0.000000  | 3.185630  |

6

33c scf done: -1194.083906

|    |           |           |           |
|----|-----------|-----------|-----------|
| Al | -0.000000 | 0.005377  | -3.813183 |
| B  | -0.000000 | 0.043237  | -5.834498 |
| Mg | -0.000000 | -0.009422 | -0.879605 |
| Al | 0.000000  | 1.195384  | 1.671108  |

|    |          |           |          |
|----|----------|-----------|----------|
| Al | 0.000000 | -1.201442 | 1.677361 |
| Al | 0.000000 | 0.003379  | 4.250563 |

Optimized geometries of BAl<sub>4</sub>Mg<sup>+</sup> (triplet) obtained at the UwB97XD/6-311++G(2d,2p) level

```

6
scf done: -1194.311221
B      -0.000000      0.000000      -0.665823
Mg      0.000000      -0.000000      2.988586
Al     -0.000000      1.535595      0.730475
Al     -0.000000     -1.535595      0.730475
Al     -0.000000      1.554246     -1.981780
Al     -0.000000     -1.554246     -1.981780

```

```

6
scf done: -1194.305328
B      -0.127014      -0.000000      1.000000
Mg      2.351059      -0.000000      1.000000
Al      0.602534      -0.000000      3.033072
Al      0.602534      -0.000000     -1.033072
Al     -1.864556      0.000000      2.265965
Al     -1.864556      0.000000     -0.265965

```

```

6
scf done: -1194.296551
B       0.246239      0.110252      0.286849
Al     -0.414557     -0.119029      2.287832
Al      2.253188      0.032191     -0.391042
Al     -0.554445     -1.493264     -0.602334
Mg     -0.938584      1.832373     -0.795827
Al      2.244373      0.188537      2.280912

```

```

6
scf done: -1194.296603
B       0.289964      0.000000      0.031046
Al     -0.187236      0.000000      2.051350
Al      2.176415     -0.000000      3.348721
Al      2.269588     -0.000000      0.691408
Al      1.283411     -0.000000     -1.751536
Mg     -1.876309      0.000000     -0.101076

```

```

6
scf done: -1194.292376
B       1.155211      0.024019      0.426754
Mg     -0.072647      0.032009      2.400384
Al      2.860789     -0.204874      1.657817
Al      1.815369      2.210766      2.265448
Al      0.292872      1.919643      0.053040
Al      0.852373     -1.380435     -0.949001

```

6

```

scf done: -1194.290979
  B    -0.191178    0.000000    0.950644
Mg     3.928803   -0.000000    1.021375
Al     1.304522   -0.000000   -0.416787
Al     1.256704   -0.000000    2.368607
Al    -1.447064   -1.832980    0.929084
Al    -1.447064    1.832980    0.929084

```

```

  6
scf done: -1194.285201
Al     0.059388   -1.108715    0.046527
Al    -1.343879    0.872623   -1.496101
  B     0.522214    0.081269   -1.547426
Al     2.190372    0.575097   -0.469371
Al    -1.367980    0.909248    1.144765
Mg     1.213395    0.658961    2.166979

```

```

  6
scf done: -1194.258080
  B     0.031270   -0.046545   -0.132366
Al     2.153444    0.526934   -0.272149
Mg    -0.062840   -1.703171    1.190926
Al    -1.508184   -0.382514   -1.671661
Al    -0.788094    1.246315    1.171385
Al    -1.771545    3.268132    2.433555

```
